# Supplementary material for: Amyloid domains in the cell nucleus controlled by nucleoskeletal protein lamin B1 reveal a new pathway of mercury neurotoxicity
Source: PeerJ. 2015 Feb 5;3:e754. doi: 10.7717/peerj.754 (PMC4327309; doi:10.7717/peerj.754)
Supplement: Data S4 — Raw data of global proteasomal activity in cytoplasmic or nuclear protein fractions of untreated or I-Hg-treated HEp-2 cells as presented in Figs. S6A, S6A’, S6B, S6B’. [file peerj-03-754-s017.xlsx]

## Sheet: raw data experiment 1
Proteasomal activity assay: Hep-2 lysate, fractionated (cytoplasm, nuclei). Fluorescence intensity of free AMC.
	w/o I-Hg, cy				w/o I-Hg, cy, lact.				w/o I-Hg, nu				w/o I-Hg, nu, lact.				I-Hg 4h, cy				I-Hg 4h, cy, lact.				I-Hg 4h, nu				I-Hg 4h, nu, lact.				I-Hg 24h, cy				I-Hg 24h, cy, lact.				I-Hg 24h, nu				I-Hg 24h, nu, lact.				negative (buffer)
t [min]	well 1	well 2	well 3	well 4	well 1	well 2	well 3	well 4	well 1	well 2	well 3	well 4	well 1	well 2	well 3	well 4	well 1	well 2	well 3	well 4	well 1	well 2	well 3	well 4	well 1	well 2	well 3	well 4	well 1	well 2	well 3	well 4	well 1	well 2	well 3	well 4	well 1	well 2	well 3	well 4	well 1	well 2	well 3	well 4	well 1	well 2	well 3	well 4	well 1
20	788	800	820	824	850	806	812	755		380	393	421		406	384	396	487	471	526	528	682	700	695	679		432	431	451		438	419	423	444	507	464	456	585	589	616	635		381	410	395		395	368	383	339
40	1134	1165	1202	1248	1338	1255	1268	1104		469	465	503		476	457	472	966	951	1130	991	1020	1124	1108	1114		730	729	745		761	753	742	928	1125	944	886	935	917	1037	1111		647	682	649		770	618	669	323
60	1498	1533	1540	1604	1855	1734	1740	1451		564	569	591		566	552	568	1412	1389	1709	1441	1414	1564	1517	1543		930	920	949		967	974	958	1462	1803	1400	1248	1369	1309	1513	1602		860	894	852		851	846	894	322
80	2006	2056	2023	2102	2245	2110	2108	1712		629	639	664		639	624	645	1776	1735	2104	1739	1711	1897	1859	1879		1063	1050	1065		1090	1127	1079	1848	2282	1716	1478	1703	1630	1858	1953		1001	1038	974		987	994	1035	319
100	2231	2275	2243	2351	2530	2407	2407	1936		678	688	716		701	677	697	2082	2045	2379	2014	1982	2174	2136	2147		1176	1150	1168		1198	1219	1193	2162	2627	1997	1715	1949	1880	2131	2241		1115	1141	1067		1143	1083	1155	321
120	2429	2466	2438	2540	2808	2670	2645	2123		730	738	751		751	724	745	2328	2310	2652	2300	2237	2443	2387	2404		1262	1227	1245		1305	1325	1295	2460	2989	2262	1941	2185	2127	2429	2508		1183	1222	1148		1195	1158	1240	320
140	2842	2888	2850	2966	3042	2891	2898	2308		770	766	799		790	770	787	2544	2529	2890	2523	2441	2677	2624	2617		1334	1299	1331		1379	1418	1363	2494	3035	2252	1922	2398	2323	2619	2718		1248	1299	1220		1257	1244	1321	306
160	2169	2188	2238	3084	3074	2134	2012	1655		647	670	811		669	632	639	2077	2078	2463	2567	2310	2234	2136	2129		1118	1355	1352		1127	1155	1093	1764	2166	1740	2061	1977	1860	2061	2074		926	947	964		1164	916	955	324
180	3023	3087	3074	3224	3075	2937	2939	2354		825	824	843		852	827	831	2818	2826	3198	2853	2506	2732	2696	2699		1439	1405	1405		1418	1422	1407	2796	3413	2569	2172	2467	2369	2743	2864		1330	1383	1296		1406	1432	1412	324
200	3188	3255	3215	3395	3082	2915	2933	2331		859	861	864		856	851	853	3000	2986	3358	3051	2497	2712	2682	2682		1491	1456	1457		1467	1472	1490	3004	3641	2743	2335	2456	2374	2725	2857		1387	1430	1355		1409	1435	1402	326
220	3333	3383	3345	3522	3092	2918	2925	2320		884	893	894		831	834	858	3190	3179	3570	3230	2497	2719	2659	2680		1548	1520	1513		1474	1461	1473	3221	3847	2915	2470	2435	2371	2716	2835		1448	1506	1397		1440	1430	1433	324
240	3470	3524	3494	3668	3066	2905	2911	2326		917	935	936		838	841	833	3356	3364	3776	3388	2498	2736	2679	2691		1617	1568	1561		1461	1458	1455	3417	4049	3090	2629	2422	2362	2705	2843		1500	1549	1446		1436	1410	1428	321
260	3617	3683	3623	3837	3066	2918	2925	2325		943	946	968		862	865	831	3507	3490	3916	3577	2509	2728	2677	2681		1655	1620	1609		1450	1474	1450	3591	4252	3243	2773	2441	2356	2719	2822		1551	1604	1503		1421	1426	1406	322
280	3751	3790	3749	3948	3084	2913	2918	2328		964	985	983		867	838	866	3646	3654	4059	3690	2505	2708	2664	2674		1716	1681	1683		1465	1456	1456	3768	4445	3407	2890	2448	2376	2727	2828		1635	1664	1559		1429	1400	1437	323
300	3885	3914	3877	4085	3088	2943	2935	2339		1003	1000	1019		846	848	840	3782	3804	4214	3848	2498	2718	2683	2676		1770	1732	1733		1475	1466	1487	3971	4660	3594	3053	2452	2373	2726	2852		1669	1713	1615		1411	1401	1421	324
320	3986	4044	3961	4203	3081	2928	2928	2338		1038	1036	1050		829	839	841	3927	3924	4322	3979	2505	2712	2673	2686		1812	1772	1788		1458	1476	1449	4094	4801	3717	3159	2449	2373	2725	2848		1722	1776	1671		1420	1413	1421	321
340	4108	4132	4059	4302	3090	2929	2939	2311		1057	1051	1080		859	838	845	4034	4027	4460	4115	2496	2729	2664	2681		1873	1817	1819		1465	1487	1457	4226	4941	3836	3261	2462	2364	2701	2818		1765	1803	1697		1425	1410	1403	324
360	4208	4233	4158	4407	3098	2922	2931	2324		1090	1097	1110		827	845	854	4142	4149	4592	4219	2515	2747	2681	2696		1920	1884	1887		1450	1467	1481	4365	5102	3965	3359	2464	2371	2719	2851		1805	1862	1750		1423	1429	1412	322
380	4311	4352	4272	4529	3087	2920	2940	2335		1117	1121	1130		866	863	868	4238	4240	4677	4335	2496	2734	2689	2693		1970	1937	1931		1473	1472	1471	4495	5238	4065	3483	2467	2375	2719	2837		1861	1913	1806		1409	1422	1412	327
400	4353	4392	4329	4564	3068	2913	2910	2314		1130	1126	1140		840	838	856	4335	4344	4765	4396	2506	2737	2675	2678		2007	1968	1987		1477	1459	1464	4610	5337	4166	3532	2459	2357	2724	2826		1883	1954	1819		1399	1409	1427	322
420	4442	4499	4404	4658	3100	2936	2942	2338		1164	1162	1171		845	844	853	4400	4436	4891	4537	2517	2746	2680	2684		2082	2028	2027		1465	1487	1482	4755	5493	4292	3640	2485	2381	2732	2859		1946	2000	1895		1413	1427	1401	325
440	4520	4588	4504	4760	3102	2940	2929	2335		1191	1200	1200		858	852	838	4517	4509	4978	4611	2512	2732	2686	2689		2129	2067	2075		1483	1463	1463	4860	5575	4432	3739	2460	2387	2733	2863		2012	2023	1941		1417	1435	1415	321
460	4612	4652	4592	4818	3112	2949	2931	2349		1212	1209	1215		840	854	866	4582	4597	5035	4690	2502	2728	2681	2673		2149	2112	2111		1453	1463	1467	4953	5703	4497	3829	2469	2383	2725	2859		2019	2074	1974		1402	1412	1409	319
480	4667	4711	4610	4891	3073	2908	2924	2325		1219	1226	1239		829	867	839	4621	4647	5108	4758	2507	2724	2664	2667		2200	2148	2139		1452	1459	1486	5019	5749	4561	3907	2473	2375	2735	2835		2067	2096	2000		1420	1426	1421	326
500	4733	4790	4697	4968	3095	2929	2941	2319		1260	1272	1262		863	840	868	4745	4749	5228	4863	2509	2736	2673	2687		2232	2176	2195		1483	1458	1480	5069	5839	4637	3937	2451	2366	2725	2837		2107	2154	2044		1426	1413	1437	324
520	4822	4851	4758	5045	3104	2919	2923	2343		1278	1286	1284		864	864	830	4808	4827	5279	4916	2525	2727	2673	2682		2280	2219	2223		1479	1459	1469	5172	5885	4683	4008	2448	2370	2712	2827		2157	2210	2094		1436	1401	1439	322
540	4895	4937	4847	5133	3097	2942	2956	2344		1302	1306	1299		838	833	857	4879	4881	5365	4985	2515	2718	2691	2675		2322	2272	2278		1480	1468	1487	5277	6066	4834	4102	2478	2376	2744	2863		2220	2251	2139		1413	1422	1434	322
560	4931	5004	4882	5175	3098	2945	2962	2342		1335	1325	1330		850	836	860	4958	4951	5412	5073	2522	2755	2680	2683		2362	2315	2314		1481	1450	1473	5374	6133	4860	4199	2460	2401	2736	2853		2234	2275	2168		1403	1409	1419	326
580	5016	5057	4977	5266	3100	2942	2948	2347		1352	1355	1341		866	827	832	5014	5016	5484	5146	2520	2730	2672	2669		2391	2350	2361		1472	1470	1478	5396	6174	4943	4216	2459	2368	2714	2836		2280	2320	2209		1400	1400	1423	319
600	5038	5088	4998	5268	3103	2911	2923	2331		1366	1363	1353		827	853	853	5059	5083	5532	5157	2512	2723	2673	2696		2449	2385	2410		1477	1479	1463	5514	6230	5035	4290	2474	2391	2739	2855		2313	2363	2233		1410	1424	1436	329
620	5126	5166	5095	5364	3095	2945	2961	2349		1391	1391	1384		831	836	849	5134	5141	5606	5198	2495	2753	2687	2684		2483	2426	2451		1483	1471	1464	5581	6330	5086	4368	2469	2386	2727	2850		2358	2393	2292		1423	1407	1433	324
640	5159	5196	5092	5422	3114	2932	2933	2348		1417	1412	1413		840	851	854	5141	5182	5652	5280	2516	2738	2669	2701		2524	2435	2468		1478	1477	1465	5621	6383	5110	4397	2473	2381	2742	2849		2412	2447	2336		1439	1420	1421	329
660	5188	5260	5151	5451	3100	2945	2965	2334		1431	1428	1435		844	866	866	5213	5231	5713	5354	2532	2739	2679	2690		2558	2501	2527		1460	1462	1455	5668	6398	5137	4450	2469	2381	2730	2848		2428	2468	2344		1427	1429	1432	328
680	5228	5301	5201	5475	3113	2922	2952	2337		1449	1457	1456		850	844	858	5267	5288	5740	5391	2525	2742	2682	2688		2597	2524	2564		1469	1463	1471	5747	6523	5253	4547	2476	2387	2749	2859		2458	2496	2398		1439	1437	1422	325
700	5312	5352	5274	5556	3090	2939	2948	2360		1464	1462	1466		857	827	862	5352	5359	5805	5456	2521	2739	2691	2715		2642	2563	2604		1483	1484	1467	5804	6585	5334	4594	2474	2404	2754	2874		2495	2543	2437		1404	1410	1430	324
720	5359	5393	5300	5601	3090	2938	2938	2342		1499	1496	1489		847	843	843	5369	5371	5844	5465	2515	2729	2680	2691		2675	2613	2638		1480	1473	1457	5842	6596	5366	4631	2467	2395	2742	2873		2524	2576	2474		1432	1422	1419	328
740	5385	5425	5332	5622	3090	2937	2939	2339		1503	1507	1500		830	841	867	5394	5420	5888	5515	2533	2744	2689	2684		2719	2650	2663		1485	1474	1466	5911	6692	5407	4672	2486	2404	2731	2870		2567	2600	2484		1408	1413	1419	325
760	5454	5507	5397	5728	3108	2953	2955	2351		1549	1550	1529		845	850	836	5476	5521	5947	5591	2524	2753	2701	2701		2757	2670	2712		1469	1484	1484	5951	6715	5475	4709	2496	2374	2737	2868		2613	2650	2556		1419	1402	1424	330
780	5503	5565	5447	5758	3106	2961	2958	2365		1563	1562	1548		828	856	846	5484	5514	5995	5675	2530	2750	2691	2686		2786	2721	2750		1454	1487	1472	6004	6768	5509	4734	2486	2393	2749	2863		2652	2686	2568		1437	1408	1434	320
800	5522	5557	5453	5780	3123	2945	2946	2360		1573	1560	1563		869	861	845	5521	5555	6036	5667	2545	2754	2692	2691		2821	2746	2756		1471	1485	1483	6087	6814	5554	4802	2470	2393	2746	2875		2693	2731	2605		1420	1427	1432	324
820	5540	5610	5474	5808	3091	2948	2938	2326		1597	1581	1588		827	832	836	5582	5602	6042	5690	2517	2750	2706	2708		2856	2788	2799		1456	1462	1472	6126	6882	5583	4820	2482	2385	2749	2857		2708	2745	2639		1431	1427	1406	323
840	5606	5656	5519	5831	3120	2948	2951	2348		1612	1613	1610		827	842	867	5646	5661	6090	5780	2533	2748	2704	2709		2882	2825	2848		1451	1462	1462	6156	6914	5613	4879	2473	2412	2751	2865		2738	2784	2662		1424	1405	1434	326
860	5642	5699	5564	5869	3119	2951	2958	2338		1621	1636	1619		857	860	864	5705	5704	6147	5755	2546	2746	2704	2701		2919	2833	2873		1450	1458	1471	6201	6915	5655	4902	2485	2384	2741	2851		2791	2813	2686		1422	1435	1417	325
880	5710	5747	5638	5965	3140	2959	2968	2376		1663	1652	1650		837	828	836	5708	5712	6191	5857	2524	2758	2703	2711		2961	2877	2912		1461	1454	1481	6256	6986	5731	4989	2495	2397	2757	2865		2825	2856	2754		1403	1425	1408	323
900	5717	5784	5660	5968	3114	2956	2965	2362		1673	1673	1659		829	841	857	5759	5768	6250	5874	2538	2763	2717	2708		3011	2903	2959		1454	1453	1464	6303	7030	5780	4991	2489	2417	2746	2874		2844	2892	2764		1398	1436	1431	322
920	5722	5788	5676	6031	3113	2959	2961	2367		1693	1678	1677		849	834	845	5776	5813	6213	5906	2530	2764	2716	2718		3024	2940	2979		1457	1471	1456	6308	7071	5784	5016	2485	2391	2749	2864		2866	2920	2793		1431	1413	1412	326
940	5747	5794	5693	5998	3100	2946	2951	2344		1705	1712	1698		855	867	846	5812	5812	6307	5907	2553	2774	2705	2710		3055	2952	3017		1464	1486	1483	6350	7111	5813	5047	2483	2388	2747	2873		2895	2940	2811		1413	1434	1406	324
960	5801	5866	5736	6071	3126	2952	2973	2359		1731	1734	1736		857	844	828	5866	5876	6318	5961	2546	2768	2706	2706		3125	3007	3023		1478	1469	1477	6430	7235	5899	5125	2508	2423	2788	2872		2944	3008	2881		1423	1409	1429	322
[truncated: 15 more columns]

## Sheet: raw data experiment 2
Proteasomal activity assay: Hep-2 lysate, fractionated (cytoplasm, nuclei). Fluorescence intensity of free AMC.
	w/o I-Hg, cy				w/o I-Hg, cy, lact.				w/o I-Hg, nu				w/o I-Hg, nu, lact.				I-Hg 4h, cy				I-Hg 4h, cy, lact.				I-Hg 4h, nu				I-Hg 4h, nu, lact.				I-Hg 24h, cy				I-Hg 24h, cy, lact.				I-Hg 24h, nu				I-Hg 24h, nu, lact.				negative (buffer)
t [min]	well 1	well 2	well 3	well 4	well 1	well 2	well 3	well 4	well 1	well 2	well 3	well 4	well 1	well 2	well 3	well 4	well 1	well 2	well 3	well 4	well 1	well 2	well 3	well 4	well 1	well 2	well 3	well 4	well 1	well 2	well 3	well 4	well 1	well 2	well 3	well 4	well 1	well 2	well 3	well 4	well 1	well 2	well 3	well 4	well 1	well 2	well 3	well 4	well 1
20	539	552	569	571	595	555	562	508		420	431	456		442	424	434	516	502	551	554	494	509	506	490		467	466	483		472	456	459	477	535	495	489	428	432	456	473		421	446	434		434	408	422	332
40	851	882	913	955	1038	962	975	824		566	563	598		572	555	568	951	937	1101	974	799	894	879	883		737	735	749		765	759	747	916	1095	930	879	747	729	838	904		750	780	751		862	721	769	331
60	1182	1214	1224	1282	1506	1397	1403	1138		652	658	676		655	641	656	1355	1337	1622	1379	1154	1293	1253	1273		919	908	934		951	957	942	1400	1712	1343	1205	1138	1087	1267	1352		940	974	934		932	929	972	327
80	1643	1691	1660	1728	1860	1741	1732	1380		710	719	744		720	707	727	1685	1651	1984	1649	1430	1593	1562	1575		1037	1025	1040		1065	1095	1052	1748	2147	1632	1414	1440	1375	1580	1667		1070	1103	1044		1056	1065	1101	326
100	1852	1886	1862	1954	2123	2011	2005	1580		756	765	790		777	755	773	1965	1926	2230	1901	1672	1850	1813	1826		1139	1119	1132		1162	1181	1155	2034	2458	1884	1630	1663	1602	1829	1929		1173	1199	1129		1198	1143	1209	329
120	2030	2065	2033	2133	2367	2248	2225	1753		802	811	821		822	798	816	2182	2167	2477	2158	1903	2087	2042	2056		1221	1188	1202		1257	1279	1248	2309	2787	2122	1833	1883	1822	2097	2168		1235	1271	1201		1246	1211	1287	326
140	2405	2437	2413	2509	2580	2448	2455	1918		838	836	865		856	838	856	2378	2363	2700	2362	2088	2303	2251	2251		1286	1253	1281		1326	1360	1310	2332	2821	2116	1814	2069	2005	2277	2365		1293	1338	1269		1299	1287	1361	328
160	1794	1810	1854	2624	2617	1764	1645	1327		728	747	875		747	714	721	1962	1957	2306	2402	1966	1897	1814	1807		1086	1302	1303		1097	1123	1066	1672	2034	1653	1940	1693	1581	1769	1778		1000	1022	1038		1216	994	1028	314
180	2571	2620	2606	2751	2615	2486	2487	1957		890	890	906		915	890	896	2627	2642	2975	2659	2146	2349	2317	2318		1379	1348	1349		1363	1366	1351	2605	3175	2404	2040	2130	2048	2382	2490		1368	1419	1334		1438	1462	1443	329
200	2720	2776	2743	2900	2620	2466	2481	1940		920	921	926		916	911	915	2796	2782	3124	2835	2136	2337	2304	2310		1427	1394	1396		1402	1407	1423	2799	3372	2567	2187	2123	2050	2365	2483		1418	1461	1389		1440	1464	1435	326
220	2843	2897	2856	3021	2623	2470	2473	1924		941	950	952		893	895	918	2961	2956	3305	2999	2138	2341	2285	2308		1477	1454	1448		1412	1399	1412	2989	3570	2719	2319	2101	2050	2359	2464		1477	1526	1428		1465	1458	1461	329
240	2977	3019	2986	3146	2602	2453	2466	1931		974	989	990		902	902	897	3121	3119	3492	3148	2143	2361	2305	2317		1538	1494	1489		1398	1395	1395	3166	3742	2873	2459	2096	2041	2354	2475		1522	1569	1475		1466	1440	1455	330
260	3103	3161	3114	3302	2608	2469	2482	1932		996	998	1020		924	927	893	3259	3242	3627	3313	2148	2353	2300	2310		1574	1543	1536		1392	1409	1392	3332	3928	3021	2584	2112	2038	2366	2459		1571	1617	1528		1447	1457	1435	329
280	3227	3266	3225	3407	2616	2471	2468	1935		1016	1036	1032		927	899	925	3376	3383	3757	3416	2149	2334	2295	2301		1634	1597	1603		1403	1396	1397	3495	4108	3158	2697	2114	2056	2370	2467		1642	1668	1573		1460	1434	1463	329
300	3350	3376	3342	3535	2624	2491	2487	1944		1050	1050	1066		907	910	904	3501	3516	3897	3557	2141	2342	2306	2303		1681	1643	1646		1412	1403	1423	3670	4294	3336	2843	2118	2045	2368	2484		1678	1713	1628		1443	1434	1453	333
320	3437	3485	3410	3629	2619	2478	2476	1942		1084	1080	1091		893	901	902	3628	3626	4002	3689	2148	2338	2293	2305		1716	1679	1696		1394	1416	1390	3786	4435	3441	2941	2116	2052	2373	2474		1726	1772	1680		1448	1441	1452	333
340	3543	3566	3510	3720	2621	2479	2488	1924		1101	1093	1120		919	900	908	3725	3727	4123	3812	2141	2353	2294	2305		1776	1724	1726		1405	1423	1394	3911	4556	3554	3025	2133	2046	2348	2448		1764	1798	1702		1456	1440	1436	333
360	3639	3663	3595	3816	2637	2479	2483	1937		1128	1136	1148		891	906	915	3829	3829	4234	3906	2152	2368	2304	2318		1818	1783	1785		1392	1405	1418	4040	4691	3667	3122	2128	2048	2367	2479		1796	1854	1749		1450	1456	1444	332
380	3740	3777	3704	3924	2625	2475	2488	1945		1155	1158	1165		926	924	927	3910	3924	4323	4002	2142	2354	2310	2315		1860	1829	1829		1412	1407	1407	4146	4827	3767	3228	2131	2048	2364	2465		1847	1893	1801		1440	1454	1445	332
400	3772	3808	3742	3970	2602	2465	2462	1922		1167	1163	1176		902	901	918	4007	4021	4402	4057	2146	2352	2303	2307		1897	1858	1872		1411	1395	1401	4256	4909	3852	3277	2126	2035	2362	2461		1868	1930	1813		1431	1441	1455	337
420	3852	3904	3824	4050	2636	2484	2493	1948		1198	1195	1203		906	908	916	4059	4096	4506	4182	2156	2365	2310	2311		1963	1912	1914		1404	1426	1418	4388	5044	3973	3374	2153	2055	2373	2488		1930	1972	1877		1441	1458	1432	334
440	3923	3978	3900	4134	2643	2489	2481	1938		1220	1228	1228		920	912	901	4171	4171	4596	4261	2155	2347	2306	2313		2005	1948	1959		1420	1404	1404	4472	5131	4085	3470	2133	2060	2375	2489		1983	1998	1922		1447	1464	1443	342
460	4012	4041	3981	4194	2642	2495	2486	1951		1240	1237	1242		902	917	927	4227	4234	4644	4329	2146	2352	2304	2299		2026	1986	1993		1392	1402	1404	4565	5248	4151	3544	2133	2062	2367	2489		1996	2046	1952		1430	1443	1439	333
480	4060	4102	4007	4258	2612	2459	2478	1933		1244	1254	1263		894	926	902	4272	4296	4712	4379	2145	2342	2295	2296		2067	2022	2018		1391	1399	1423	4616	5292	4216	3610	2139	2054	2382	2473		2034	2058	1978		1452	1454	1449	336
500	4119	4170	4085	4333	2634	2480	2487	1932		1282	1294	1286		922	902	927	4384	4378	4808	4477	2148	2353	2302	2310		2097	2051	2061		1417	1398	1416	4677	5363	4286	3642	2120	2046	2369	2468		2074	2119	2016		1455	1444	1466	339
520	4193	4221	4144	4391	2634	2467	2479	1950		1302	1307	1307		924	926	892	4438	4461	4871	4535	2162	2348	2304	2309		2140	2087	2090		1417	1398	1408	4757	5419	4323	3714	2117	2051	2361	2460		2116	2168	2056		1463	1434	1464	337
540	4255	4293	4210	4485	2638	2494	2508	1947		1320	1324	1320		901	897	917	4505	4509	4943	4599	2156	2343	2314	2305		2180	2130	2143		1419	1409	1425	4870	5564	4458	3796	2142	2051	2380	2490		2171	2200	2099		1442	1449	1464	339
560	4300	4362	4259	4524	2632	2494	2505	1948		1352	1343	1346		912	898	922	4561	4561	4986	4678	2157	2371	2301	2303		2220	2175	2175		1415	1392	1409	4956	5628	4485	3884	2128	2072	2380	2479		2183	2228	2130		1433	1441	1451	340
580	4382	4400	4332	4606	2632	2492	2495	1953		1367	1371	1359		924	892	896	4618	4626	5037	4733	2158	2348	2300	2292		2239	2204	2214		1407	1408	1413	4976	5670	4555	3899	2124	2045	2363	2466		2230	2267	2165		1432	1431	1454	339
600	4396	4433	4346	4602	2643	2469	2475	1941		1379	1376	1368		890	915	915	4654	4673	5085	4750	2153	2349	2302	2316		2295	2238	2261		1412	1414	1404	5080	5732	4632	3969	2140	2068	2384	2491		2257	2309	2185		1442	1455	1465	339
620	4472	4508	4437	4691	2631	2495	2504	1950		1400	1401	1394		895	900	912	4720	4745	5158	4794	2142	2367	2315	2305		2329	2278	2301		1419	1408	1401	5132	5804	4694	4038	2141	2062	2372	2487		2296	2336	2237		1454	1440	1461	341
640	4498	4542	4450	4742	2648	2487	2487	1953		1423	1420	1421		902	913	915	4743	4783	5196	4859	2160	2353	2295	2322		2368	2286	2314		1417	1412	1405	5182	5862	4717	4062	2142	2055	2381	2484		2347	2385	2280		1464	1452	1450	334
660	4531	4592	4501	4764	2636	2491	2511	1944		1439	1435	1439		907	927	928	4807	4825	5246	4919	2171	2356	2307	2311		2389	2342	2362		1396	1398	1396	5206	5880	4740	4112	2131	2060	2369	2482		2365	2401	2290		1455	1457	1459	340
680	4555	4632	4547	4795	2643	2475	2497	1945		1455	1463	1462		912	905	917	4851	4865	5278	4957	2164	2361	2301	2310		2434	2361	2402		1408	1402	1409	5292	5998	4843	4194	2144	2061	2386	2494		2394	2422	2333		1466	1464	1449	336
700	4645	4677	4596	4871	2630	2487	2493	1961		1471	1467	1472		916	891	923	4919	4932	5328	5012	2164	2363	2317	2333		2466	2400	2432		1421	1420	1403	5335	6034	4908	4235	2138	2073	2396	2502		2424	2466	2368		1436	1439	1456	340
720	4674	4718	4624	4910	2625	2488	2486	1949		1498	1497	1489		908	907	904	4934	4941	5370	5026	2159	2350	2302	2311		2498	2446	2469		1420	1410	1397	5375	6055	4930	4271	2134	2068	2389	2499		2454	2502	2407		1462	1452	1447	341
740	4715	4747	4661	4932	2631	2486	2492	1949		1504	1510	1500		895	903	927	4971	4980	5405	5084	2171	2363	2313	2310		2535	2476	2494		1424	1412	1404	5439	6145	4969	4305	2156	2074	2376	2494		2484	2515	2416		1439	1441	1447	333
760	4770	4808	4710	5008	2641	2496	2499	1957		1543	1544	1527		908	910	898	5041	5075	5474	5154	2168	2370	2323	2328		2575	2499	2536		1405	1421	1417	5471	6155	5039	4352	2156	2052	2379	2499		2528	2564	2476		1451	1431	1451	340
780	4824	4862	4769	5051	2647	2507	2511	1971		1559	1558	1545		890	918	909	5056	5081	5508	5219	2167	2365	2310	2312		2599	2540	2563		1393	1423	1407	5517	6214	5059	4364	2151	2072	2392	2488		2565	2601	2492		1463	1439	1462	340
800	4837	4867	4766	5077	2654	2499	2495	1962		1568	1555	1556		927	921	906	5089	5116	5541	5206	2183	2368	2321	2319		2629	2570	2573		1408	1424	1422	5596	6253	5107	4422	2140	2065	2388	2502		2604	2635	2524		1448	1458	1459	342
820	4854	4910	4795	5079	2633	2493	2489	1937		1586	1577	1579		892	895	899	5143	5145	5565	5239	2161	2373	2325	2328		2666	2598	2616		1395	1399	1407	5619	6310	5136	4454	2147	2058	2391	2494		2619	2649	2549		1459	1456	1437	338
840	4907	4941	4827	5109	2652	2499	2501	1953		1601	1601	1603		890	904	927	5187	5199	5595	5303	2171	2369	2330	2330		2689	2631	2660		1391	1398	1401	5649	6334	5161	4500	2137	2082	2389	2492		2641	2686	2580		1451	1438	1462	339
860	4936	4990	4876	5152	2651	2505	2506	1945		1613	1626	1609		920	920	924	5240	5240	5649	5281	2185	2363	2323	2323		2725	2647	2680		1392	1396	1407	5698	6352	5194	4516	2148	2060	2386	2481		2687	2718	2602		1454	1464	1445	343
880	5000	5045	4946	5224	2668	2509	2517	1978		1651	1642	1635		899	891	897	5254	5256	5679	5390	2163	2376	2323	2334		2760	2685	2716		1400	1392	1416	5742	6409	5260	4589	2155	2074	2398	2490		2724	2755	2661		1434	1454	1436	340
900	5007	5062	4953	5226	2646	2500	2512	1967		1661	1659	1648		893	905	917	5308	5305	5737	5407	2176	2381	2337	2334		2801	2712	2758		1392	1390	1402	5793	6455	5307	4602	2159	2087	2391	2504		2745	2778	2670		1432	1465	1461	342
920	5021	5076	4981	5281	2642	2508	2511	1970		1673	1664	1658		912	896	908	5310	5337	5720	5439	2165	2382	2332	2344		2817	2746	2780		1393	1408	1394	5799	6474	5316	4631	2154	2068	2392	2495		2763	2814	2695		1457	1443	1445	343
940	5034	5071	4978	5261	2639	2498	2501	1950		1687	1693	1678		915	927	906	5340	5346	5782	5441	2186	2391	2329	2333		2845	2753	2806		1402	1425	1421	5837	6527	5347	4640	2149	2061	2390	2506		2787	2832	2712		1443	1460	1435	341
960	5093	5139	5024	5320	2660	2499	2517	1961		1712	1715	1712		917	906	893	5383	5394	5799	5491	2183	2388	2332	2326		2907	2804	2821		1413	1410	1413	5906	6630	5432	4719	2169	2094	2428	2498		2836	2886	2770		1452	1439	1458	343
[truncated: 15 more columns]

## Sheet: raw data experiment 3
Proteasomal activity assay: Hep-2 lysate, fractionated (cytoplasm, nuclei). Fluorescence intensity of free AMC.
	w/o I-Hg, cy				w/o I-Hg, cy, lact.				w/o I-Hg, nu				w/o I-Hg, nu, lact.				I-Hg 4h, cy				I-Hg 4h, cy, lact.				I-Hg 4h, nu				I-Hg 4h, nu, lact.				I-Hg 24h, cy				I-Hg 24h, cy, lact.				I-Hg 24h, nu				I-Hg 24h, nu, lact.				negative (buffer)
t [min]	well 1	well 2	well 3	well 4	well 1	well 2	well 3	well 4	well 1	well 2	well 3	well 4	well 1	well 2	well 3	well 4	well 1	well 2	well 3	well 4	well 1	well 2	well 3	well 4	well 1	well 2	well 3	well 4	well 1	well 2	well 3	well 4	well 1	well 2	well 3	well 4	well 1	well 2	well 3	well 4	well 1	well 2	well 3	well 4	well 1	well 2	well 3	well 4	well 1
20	538	552	569	572	595	555	562	560		418	431	456		442	424	435	515	501	551	554	495	510	507	492		467	466	484		473	456	461	478	535	495	489	428	433	455	473		422	446	435		434	407	423	344
40	777	806	836	884	965	890	903	901		493	489	522		499	482	495	876	864	1022	901	728	820	806	807		662	660	677		692	685	673	599	764	616	568	674	658	764	830		555	586	557		660	524	569	331
60	1107	1138	1150	1208	1434	1323	1329	1329		579	582	603		582	567	582	1280	1263	1546	1305	1080	1221	1179	1197		846	836	862		876	882	872	1036	1317	985	859	1065	1013	1191	1276		737	772	734		926	721	764	332
80	1371	1413	1385	1453	1780	1667	1659	1657		637	645	670		644	633	653	1614	1576	1917	1572	1359	1520	1485	1504		966	950	967		993	1018	980	1350	1710	1246	1051	1370	1300	1506	1588		863	900	837		1086	854	890	330
100	1573	1612	1590	1681	2050	1942	1927	1926		685	692	716		705	680	699	1892	1854	2158	1826	1598	1778	1736	1753		1066	1042	1057		1086	1106	1080	1606	1994	1473	1245	1588	1531	1754	1849		962	990	918		1193	934	994	328
120	1757	1789	1762	1860	2286	2170	2157	2151		728	738	747		748	724	741	2113	2089	2405	2088	1824	2013	1969	1979		1151	1116	1125		1182	1203	1172	1856	2292	1693	1423	1816	1754	2020	2096		1026	1064	992		1288	996	1066	323
140	1935	1963	1937	2040	2510	2376	2379	2379		763	762	790		781	762	783	2308	2287	2629	2283	2020	2227	2174	2176		1209	1179	1210		1251	1286	1239	2055	2505	1866	1588	1994	1931	2205	2290		1078	1119	1056		1365	1069	1139	333
160	1323	1334	1380	2149	2550	1688	1568	1570		655	672	801		672	639	646	1888	1890	2231	2320	1892	1824	1739	1734		1008	1228	1230		1021	1048	991	1467	1789	1444	1706	1621	1507	1700	1705		797	816	831		1004	787	819	324
180	2561	2621	2599	2748	2534	2412	2414	2414		815	815	830		811	790	810	2555	2561	2909	2586	2073	2269	2247	2250		1304	1271	1277		1285	1347	1297	2297	2815	2124	1789	2056	1980	2308	2414		1156	1202	1116		1400	1108	1173	330
200	2730	2784	2749	2918	2542	2392	2408	2403		846	844	854		808	786	811	2729	2712	3047	2760	2061	2268	2221	2233		1355	1319	1319		1284	1340	1295	2469	2988	2260	1924	2050	1978	2293	2412		1206	1248	1172		1409	1111	1169	331
220	2845	2916	2879	3048	2549	2394	2395	2394		867	879	878		813	791	811	2886	2881	3232	2929	2072	2270	2215	2234		1399	1380	1371		1283	1349	1300	2651	3163	2402	2043	2032	1981	2292	2394		1259	1307	1214		1405	1118	1182	329
240	2999	3054	3010	3191	2533	2385	2392	2392		902	915	919		823	797	819	3050	3040	3421	3080	2073	2292	2228	2252		1461	1419	1419		1290	1353	1303	2801	3315	2539	2170	2028	1969	2281	2396		1304	1344	1254		1414	1109	1179	329
260	3147	3216	3149	3350	2526	2395	2402	2405		922	924	943		822	802	823	3187	3177	3559	3236	2067	2270	2231	2234		1503	1471	1462		1299	1343	1299	2954	3497	2669	2283	2038	1965	2292	2388		1348	1391	1306		1416	1120	1184	329
280	3278	3317	3273	3475	2546	2398	2393	2399		942	958	958		821	800	819	3305	3301	3686	3355	2070	2261	2224	2227		1558	1524	1528		1309	1362	1320	3102	3648	2799	2389	2035	1977	2293	2397		1411	1445	1345		1422	1120	1189	328
300	3411	3439	3401	3619	2556	2418	2405	2409		973	977	992		827	805	833	3431	3434	3828	3493	2067	2270	2230	2229		1611	1572	1574		1306	1368	1317	3264	3813	2966	2511	2038	1976	2295	2409		1453	1485	1398		1447	1128	1195	329
320	3510	3560	3490	3723	2552	2411	2411	2408		1009	1008	1017		831	807	831	3543	3555	3925	3625	2069	2265	2215	2222		1648	1606	1623		1300	1360	1316	3371	3948	3059	2603	2047	1985	2306	2403		1502	1545	1448		1456	1132	1204	331
340	3619	3656	3595	3824	2548	2409	2415	2409		1026	1017	1044		836	817	832	3657	3653	4049	3736	2065	2281	2228	2233		1706	1648	1648		1318	1359	1320	3481	4054	3142	2678	2059	1969	2283	2370		1534	1570	1478		1440	1129	1213	330
360	3724	3764	3677	3935	2565	2412	2411	2413		1054	1065	1074		844	819	850	3753	3749	4145	3821	2086	2284	2232	2239		1750	1709	1708		1322	1382	1330	3587	4170	3253	2766	2060	1975	2299	2398		1570	1619	1523		1438	1133	1208	329
380	3846	3872	3812	4040	2550	2400	2409	2410		1080	1086	1088		850	821	845	3845	3850	4253	3931	2069	2288	2243	2239		1794	1749	1760		1320	1381	1333	3686	4298	3349	2862	2056	1976	2290	2393		1612	1658	1565		1457	1138	1218	331
400	3886	3903	3844	4091	2528	2398	2381	2381		1093	1087	1105		835	819	844	3925	3946	4315	3986	2074	2277	2231	2238		1822	1791	1795		1323	1374	1332	3783	4376	3427	2902	2053	1961	2286	2395		1633	1696	1580		1433	1128	1206	328
420	3963	4016	3944	4173	2560	2404	2418	2419		1122	1125	1130		855	826	855	3998	4019	4434	4103	2082	2298	2237	2238		1884	1838	1844		1336	1395	1348	3897	4496	3535	2990	2079	1981	2303	2405		1692	1731	1644		1460	1145	1215	330
440	4052	4097	4019	4287	2573	2410	2413	2403		1149	1152	1153		854	834	852	4085	4105	4524	4184	2079	2267	2236	2238		1926	1873	1888		1339	1400	1344	3971	4572	3627	3078	2060	1984	2305	2408		1745	1768	1685		1456	1148	1219	328
460	4142	4174	4108	4339	2572	2422	2416	2412		1163	1166	1172		861	834	855	4158	4158	4572	4248	2078	2280	2230	2231		1957	1915	1917		1343	1397	1355	4069	4685	3692	3143	2059	1987	2301	2423		1762	1799	1716		1451	1144	1209	326
480	4185	4227	4146	4400	2537	2377	2402	2398		1175	1179	1189		854	825	855	4189	4226	4635	4299	2076	2268	2222	2218		1990	1952	1944		1341	1385	1344	4103	4716	3744	3207	2068	1977	2307	2403		1794	1816	1748		1441	1144	1217	325
500	4275	4318	4226	4498	2562	2405	2421	2411		1208	1216	1215		864	837	862	4318	4309	4718	4396	2079	2277	2232	2237		2027	1981	1986		1342	1389	1352	4178	4777	3814	3243	2043	1973	2302	2386		1835	1883	1777		1460	1142	1218	326
520	4337	4375	4298	4569	2558	2388	2414	2408		1228	1232	1232		867	842	862	4368	4381	4794	4467	2093	2269	2240	2232		2064	2013	2022		1337	1393	1349	4238	4839	3854	3301	2041	1973	2289	2380		1877	1916	1817		1460	1156	1218	329
540	4417	4448	4360	4662	2571	2413	2429	2427		1248	1252	1251		869	843	860	4420	4433	4862	4518	2081	2270	2239	2231		2104	2064	2075		1343	1399	1347	4342	4965	3966	3388	2066	1983	2299	2422		1923	1955	1860		1464	1160	1238	331
560	4476	4532	4423	4720	2556	2414	2426	2431		1277	1272	1277		872	853	873	4494	4491	4910	4600	2082	2289	2224	2228		2147	2100	2101		1353	1400	1358	4413	5009	4008	3442	2054	1990	2299	2404		1936	1981	1892		1471	1162	1233	336
580	4547	4573	4485	4789	2555	2415	2417	2426		1292	1295	1286		875	843	868	4542	4552	4951	4652	2085	2280	2225	2223		2166	2125	2148		1350	1389	1353	4438	5061	4056	3468	2054	1974	2290	2395		1984	2021	1925		1475	1157	1228	330
600	4549	4593	4521	4790	2568	2399	2410	2406		1303	1305	1297		870	843	866	4592	4598	5017	4669	2077	2270	2231	2250		2225	2167	2183		1355	1400	1366	4526	5117	4122	3528	2069	1998	2310	2420		2006	2060	1940		1469	1153	1231	331
620	4645	4687	4613	4890	2559	2420	2422	2424		1328	1333	1319		882	851	868	4665	4661	5078	4720	2076	2289	2240	2232		2247	2208	2228		1358	1411	1367	4574	5178	4170	3582	2063	1986	2306	2416		2050	2091	1994		1489	1168	1235	334
640	4683	4726	4608	4941	2569	2418	2412	2417		1347	1343	1348		887	856	884	4675	4708	5108	4780	2083	2279	2227	2238		2299	2212	2246		1350	1407	1370	4617	5239	4201	3617	2072	1988	2315	2403		2090	2134	2027		1489	1166	1248	331
660	4729	4790	4681	4968	2565	2422	2435	2439		1365	1363	1366		880	864	880	4739	4756	5174	4836	2094	2280	2234	2239		2324	2262	2293		1359	1408	1366	4635	5264	4216	3652	2058	1985	2293	2402		2115	2149	2043		1479	1169	1237	333
680	4748	4817	4735	5003	2566	2408	2427	2421		1384	1388	1386		884	856	881	4764	4788	5217	4873	2089	2291	2230	2238		2357	2294	2322		1365	1418	1379	4730	5346	4306	3728	2065	1989	2310	2418		2143	2173	2086		1487	1169	1230	329
700	4834	4879	4783	5083	2557	2418	2420	2422		1397	1395	1401		885	864	886	4828	4858	5260	4948	2096	2289	2237	2251		2389	2329	2352		1354	1423	1370	4764	5383	4368	3771	2059	1999	2316	2427		2177	2212	2121		1489	1169	1239	333
720	4870	4912	4823	5134	2551	2417	2418	2415		1424	1422	1417		883	859	879	4862	4872	5290	4947	2082	2278	2225	2244		2414	2377	2400		1371	1411	1370	4789	5397	4397	3803	2060	1991	2319	2425		2196	2244	2148		1488	1171	1237	333
740	4916	4937	4856	5148	2568	2417	2417	2427		1435	1438	1430		882	865	896	4906	4914	5343	5018	2103	2283	2244	2228		2466	2401	2423		1370	1422	1375	4859	5485	4435	3829	2080	1993	2310	2416		2233	2265	2164		1479	1162	1244	331
760	4964	5003	4914	5226	2565	2415	2428	2424		1465	1471	1454		899	877	896	4968	4999	5399	5077	2096	2295	2250	2253		2496	2424	2457		1373	1425	1380	4887	5521	4497	3870	2092	1982	2309	2429		2273	2302	2222		1494	1171	1252	325
780	5044	5082	4959	5277	2573	2433	2436	2431		1483	1487	1475		899	880	902	4971	5011	5429	5145	2088	2291	2228	2242		2527	2458	2487		1367	1418	1382	4939	5537	4516	3877	2077	2006	2311	2418		2301	2350	2234		1491	1176	1265	328
800	5057	5080	4973	5307	2575	2428	2424	2425		1494	1479	1486		897	867	898	5031	5031	5477	5118	2114	2291	2243	2246		2563	2491	2504		1374	1434	1382	4984	5580	4553	3948	2058	1995	2316	2423		2338	2367	2259		1486	1172	1246	328
820	5066	5118	5014	5300	2557	2420	2418	2418		1517	1507	1501		897	870	896	5074	5076	5504	5172	2085	2294	2245	2257		2591	2522	2539		1372	1428	1383	5013	5637	4577	3970	2069	1986	2311	2414		2357	2386	2288		1490	1172	1249	328
840	5126	5149	5032	5344	2573	2425	2428	2430		1528	1529	1523		896	879	911	5115	5112	5516	5226	2097	2294	2260	2259		2619	2557	2591		1375	1423	1386	5056	5672	4617	4004	2066	2005	2311	2423		2383	2425	2322		1508	1175	1251	330
860	5165	5214	5087	5396	2567	2438	2429	2426		1544	1557	1540		909	887	905	5168	5149	5588	5218	2108	2284	2244	2250		2653	2566	2611		1383	1439	1400	5082	5673	4630	4031	2074	1988	2308	2402		2418	2451	2340		1514	1185	1267	329
880	5218	5271	5163	5482	2585	2433	2444	2441		1579	1573	1556		914	878	919	5174	5164	5600	5319	2091	2295	2254	2260		2686	2605	2645		1385	1436	1395	5126	5716	4686	4091	2076	1995	2323	2425		2457	2488	2393		1519	1185	1268	336
900	5242	5284	5164	5478	2566	2424	2434	2433		1585	1579	1578		911	890	912	5230	5237	5660	5314	2108	2311	2253	2263		2726	2640	2680		1385	1446	1397	5162	5774	4727	4111	2088	2007	2314	2425		2481	2517	2408		1512	1186	1261	331
920	5246	5317	5217	5537	2566	2439	2434	2434		1597	1589	1590		911	883	907	5236	5254	5641	5358	2097	2311	2251	2267		2742	2670	2713		1380	1442	1400	5171	5776	4738	4128	2081	1998	2319	2423		2499	2543	2439		1509	1190	1272	328
940	5278	5316	5216	5509	2562	2414	2430	2431		1612	1621	1603		924	897	917	5273	5285	5706	5367	2113	2311	2262	2259		2765	2678	2722		1389	1437	1413	5218	5821	4762	4145	2078	1982	2319	2433		2522	2563	2448		1520	1184	1271	331
960	5333	5379	5255	5584	2594	2417	2444	2447		1634	1641	1638		928	895	925	5304	5323	5741	5417	2113	2312	2263	2257		2822	2731	2746		1391	1453	1412	5270	5909	4837	4209	2100	2017	2347	2424		2568	2609	2509		1535	1205	1282	325
[truncated: 15 more columns]

## Sheet: mean and SD (backgr. corrected)
Proteasomal activity assay: mean values of replicated wells within one experiment (3 to 4 wells per experiment). Fluorescence background correction: sample value minus value of "negative (buffer)".
	w/o I-Hg, cy			w/o I-Hg, cy, lact.			w/o I-Hg, nu			w/o I-Hg, nu, lact.			I-Hg 4h, cy			I-Hg 4h, cy, lact.			I-Hg 4h, nu			I-Hg 4h, nu, lact.			I-Hg 24h, cy			I-Hg 24h, cy, lact.			I-Hg 24h, nu			I-Hg 24h, nu, lact.			positive (AMC)			positive (AMC), lact.
t [min]	Exp 1	Exp 2	Exp 3	Exp 1	Exp 2	Exp 3	Exp 1	Exp 2	Exp 3	Exp 1	Exp 2	Exp 3	Exp 1	Exp 2	Exp 3	Exp 1	Exp 2	Exp 3	Exp 1	Exp 2	Exp 3	Exp 1	Exp 2	Exp 3	Exp 1	Exp 2	Exp 3	Exp 1	Exp 2	Exp 3	Exp 1	Exp 2	Exp 3	Exp 1	Exp 2	Exp 3	Exp 1	Exp 2	Exp 3	Exp 1	Exp 2	Exp 3
20	468	224.25	224.25	470	224.25	233.75	57.6667	101.667	105	60.3333	102.333	100.333	163	197.25	196.75	353.25	169	166.75	97.6667	138	142.333	91.6667	131.333	130	127.75	165.5	165.75	270.5	116.5	113	55	99.6667	104.333	47	90.3333	88	28859.5	30838.8	31524.5	29729.8	30245	30801.2
40	865.5	573.25	502	918.25	626	588.25	157.667	250	180	146.667	239.333	164.667	687.75	663.75	592	768.5	540	463.75	413.333	414.667	345	430.333	431.333	356	649	628	313	677	480.75	405	338	434.667	244.667	364	458.333	257	28498	30615.8	31022	29737.5	29923.8	31266
60	1220.5	903	830.25	1374	1042.25	1031.75	251	341	271.333	240.667	330	255.667	1164.5	1100.75	1028	1188.5	924.5	847.25	609.333	599.333	531.333	645	629.333	555.333	1155	1092.5	728.75	1127.25	892.25	814.25	545	628.333	431	542.333	623.667	482.333	28358.5	30272.8	30775.5	29705.2	29609.2	30931.2
80	1726	1358.25	1086	1724	1359.75	1368.75	322.667	403.333	334.667	316.333	398.333	321.333	1517.75	1420	1350.25	1516.75	1221.5	1145	738	713	645	779	751	675	1510.25	1413	1019.75	1466.25	1197	1119	683	751.333	550.667	685.667	754.333	621.333	28260.8	30360.5	30599.2	29518	29727	30768.2
100	1954.75	1564.75	1295	1999.75	1604.25	1640.25	374	448.333	381.667	372	441.333	373.333	1809.75	1681.75	1613.5	1789.5	1464.75	1395.25	844.667	808	739	883.667	839	769.333	1805	1677.75	1260.5	1730	1430.25	1359.5	787.667	845	640.667	807.333	856.333	719	28204	30400.8	30465.5	29426	29699.2	30675.8
120	2149	1740.75	1472.5	2242.25	1822.5	1868	420.667	487.333	419.333	421.333	486	414.333	2078.25	1921.5	1854.25	2048.5	1696.25	1623.25	925.667	879.667	812.333	989.667	935.333	862.333	2093.75	1938.25	1496.5	1993	1666.75	1598.5	865.333	911.667	709	879	922	793.333	28276.5	30323	30648.8	29619.5	29641.2	30842.5
140	2579	2113.5	1645.25	2479.25	2021.75	2087.75	470.333	519	451.333	478.333	522	451.667	2314	2123.25	2053.25	2284.25	1894.75	1826	1013.33	946	879	1082.67	1004	935	2118.25	1943.25	1680	2209	1850.5	1781.75	947.667	972.667	764	970	987.667	867.333	18917.2	30317	30708.8	20429.2	29563	30923.2
160	2096	1709.25	1236.25	1896.25	1512.75	1541.75	385.667	473	403.667	324.667	398.333	349	1972.5	1845.5	1772	1879.75	1545.5	1495	951.333	920	849.667	803	766.333	716.667	1609	1513.5	1291.25	1670.5	1379.75	1331	622	709.667	509	689.667	750.333	566.667	28389	21831.5	27788.8	29532.5	20423.2	20670.2
180	2778	2303.25	2309.75	2503.75	2044.5	2121.75	506.667	560	500	514.333	557.333	482.667	2599.75	2392	2330.25	2335.75	1940.75	1888	1092.33	1023.33	964	1093.33	1017	988.667	2413.5	2222.25	1933.75	2288.25	1920.75	1867.75	1012.33	1038.33	838	1094.33	1104.67	906	28444.2	30573.8	30615.2	29634	29728.5	30869.5
200	2939	2453.25	2474	2491.5	2037.75	2110.75	537.667	589	530	529.333	572.333	476.333	2774.5	2552.75	2490.75	2319.5	1932.75	1870.25	1144.33	1072.33	1013	1152.33	1069	981	2606.5	2399.75	2089	2279.25	1916.25	1857.75	1067	1089.33	890.667	1091.33	1104.67	904.333	28324.8	30500	30686	29527.2	29667.2	30937.8
220	3072.5	2573.5	2597.75	2492	2034	2107.5	567.333	616.333	552	519.667	561.667	480	2969	2724.5	2657.75	2317	1929.5	1872.25	1204	1128.33	1060.67	1148	1067.33	985.667	2790	2568.5	2240.5	2267.5	1905	1849.25	1127.33	1145.67	937.333	1113	1121	910	28292.2	30438.2	30774	29428.2	29576.8	31024.5
240	3218.25	2703	2744.25	2481.75	2022	2103.5	608.667	655.667	596	517.667	557.333	491.333	3150.25	2891	2828.5	2330.75	1940.5	1889.25	1261.33	1178.33	1117	1138.33	1053	993.667	2975.5	2731	2387	2262.75	1900.5	1846.5	1177.67	1193.33	984.667	1105	1110.67	912.333	28315.5	30484.8	30389	29427.2	29692.5	30599.5
260	3369.5	2839	2892.5	2490	2033	2107.5	632.333	673	608.667	535	572.333	492	3302	3029.25	2966.75	2330.25	1938	1876	1308	1219.33	1157.67	1140.33	1055.33	990	3144.25	2885.25	2527.75	2266	1904	1846.25	1232.67	1240.33	1027.33	1100	1104	916.333	28234	30731	30678.5	29440.5	29855.2	30967.5
280	3489.75	2946.75	3013.5	2491.25	2030.5	2109.75	658.667	691.667	632.333	537.333	572.333	491.333	3442.5	3148.5	3089.5	2318.25	1927.75	1871.25	1374.67	1275	1216.33	1139.33	1054	1008.33	3307.75	3030	2662.25	2275.25	1909.75	1851.25	1300.67	1291.33	1080	1102.33	1107.67	921.667	28274.8	30830	30543	29451.5	29835.2	30815
300	3616	3065	3146.25	2501.75	2042.75	2123.25	683	718.667	662	521	561.333	500.667	3587.75	3282	3225.25	2319.25	1929.25	1875.25	1420.67	1320	1267	1152.33	1067	1009.33	3495.25	3200	2817.25	2276.25	1910	1855.75	1341.33	1336.33	1126.67	1087.33	1097.67	935.667	28424.5	31062	30549	29633.8	29956.5	30806.5
320	3726	3156	3246	2496.25	2034.75	2117	718.333	750.333	688.667	513.333	552.667	495.667	3715.5	3402	3337.25	2321.5	1927	1864.25	1467.67	1362.33	1303	1138	1054	998	3620.25	3316.5	2920.5	2276.25	1909.75	1856.75	1400	1391.33	1175.67	1095	1101	936.667	28272.2	31141.5	30661.8	29452.8	29929.8	30932.8
340	3825	3251.75	3351	2492.5	2034.5	2119	737	771.667	709	522.333	561.667	503.667	3833.75	3513.75	3451.25	2317.75	1929.75	1875.5	1510.67	1409	1347.33	1144.67	1060	1007.67	3740.75	3428.5	3016.25	2261.5	1900.25	1844	1429.33	1421.67	1207.33	1087.67	1096.67	936	28468.8	31214.8	30566	29617.8	30003.2	30820.5
360	3929	3345.5	3452.75	2493.5	2038.75	2122	776.333	804.333	744.333	518	555.667	511.333	3953	3616.75	3544.75	2334.5	1940.25	1882	1574.33	1462.33	1402.33	1142	1056.67	1018.33	3875.25	3547.25	3121.75	2276	1910.25	1854.75	1483	1466.67	1250.67	1097.33	1101.67	933.333	28320.5	31360.2	30603.2	29459.8	30001.8	30818
380	4036.5	3453.75	3570	2496.75	2036	2114.5	792.333	826.667	765	542.667	575.667	514.333	4043	3707.25	3647.25	2329.25	1933	1882	1615.67	1506.67	1448	1149	1058.67	1020.33	3990.75	3659.5	3226.25	2275.75	1904.75	1851	1529.67	1514.33	1292	1091.33	1096.33	946.667	28565	31378.8	30747	29720	30125	30909.8
400	4084.25	3490	3607.5	2478.5	2018.5	2094.75	805.667	837	773	522	560	509	4134.75	3788.75	3719.5	2326.25	1932.75	1877.75	1661	1544	1480.67	1144	1055.33	1019.33	4086	3740.5	3298.5	2268.75	1901.75	1846.5	1559	1538.67	1314.33	1089	1095.33	932	28326.2	31284.2	30569.2	29456.5	30104	30791.2
420	4174.25	3574.5	3698	2506.5	2045	2120.25	838.667	866	801	524.667	563	516	4239.5	3877.75	3812.5	2334.25	1940.25	1883.75	1718.67	1597	1530.67	1155.33	1069	1030.33	4218.5	3861.75	3403.5	2291.75	1922	1862	1620	1593.67	1364.33	1091	1096.67	944	28300.8	31524.5	30572.8	29465.5	30219.5	30802.5
440	4267	3648	3790.25	2502	2042.75	2120	869.333	891.667	829.333	525.333	563.333	520	4327.75	3964	3901	2330.25	1935.25	1875.25	1762.67	1637	1573.67	1145.67	1061.67	1034.33	4325.5	3953.75	3488.5	2286.25	1919.25	1859.5	1664.33	1634	1410.67	1098.33	1103.67	947.667	28450.5	31662.8	30539.2	29658	30270	30754.2
460	4344.25	3722.25	3869	2509.25	2048.5	2127.75	886	904.333	846.667	529	567	523.667	4401.75	4023.75	3962.25	2320	1930.25	1877	1798	1666.33	1609.33	1136.67	1051	1038.67	4421.25	4042.25	3575.5	2283	1917.75	1864.75	1696.33	1662.67	1438.67	1083.33	1089	941.667	28340	31592.8	30476.2	29532.2	30260.5	30739.2
480	4391.75	3772.25	3914.5	2484.75	2027.75	2100.5	899.333	919.667	856	523	562	518	4455.5	4080.25	4012.25	2317.75	1926.75	1868	1833.67	1701.67	1637	1143.67	1059	1030	4481	4099	3617.5	2281.75	1919.25	1860.75	1725.67	1689.33	1461	1100.33	1106.33	940.667	28384	31543.5	30461.2	29532	30216	30742.8
500	4469	3841.5	4005.5	2495.5	2037.5	2122.5	935.333	953.333	890	532.333	568	528	4568.25	4176.5	4111.5	2325.75	1932.5	1879	1871.67	1735.67	1675	1149	1061.33	1034.67	4542.5	4156.75	3679.25	2269.25	1905	1848.75	1772.33	1735.67	1508.67	1100.67	1106	947	28440.8	31737.8	30393.5	29622.8	30433.2	30692.2
520	4541.25	3903	4071.25	2496	2034.75	2115.25	953	972	909	527.667	563	532	4629.75	4242	4179	2325.5	1933	1881.75	1911	1772.33	1711.33	1144	1056.67	1034.67	4609.25	4219	3734.5	2263	1899.5	1844	1824	1780	1548.33	1100.33	1102.67	953	28436.5	31780.5	30664	29686	30536	30979.2
540	4623.5	3973	4144.25	2506.75	2048.25	2129.25	970.333	984	924	515.667	553.667	528.333	4698	4301.25	4230.75	2321.75	1931	1874.5	1958.67	1813.67	1754.67	1151.33	1066.33	1034	4740.25	4334.25	3837.75	2287.25	1917.25	1861.75	1871.33	1819.33	1586.33	1096	1100.33	958.333	28399.8	31888.2	30618.8	29531	30609	31065.8
560	4666	4026	4209	2507	2049.25	2126.25	996	1013.33	949	519.667	561.667	537	4766.5	4361.25	4295	2330.25	1937.5	1875.25	1996.33	1856.33	1789.67	1139	1056.33	1041.33	4809.5	4403	3889.25	2282.75	1919.25	1856.25	1891.67	1846.67	1610	1081.33	1092.67	959.667	28529	31893.5	30704.8	29719.2	30621.8	31073
580	4752	4093.25	4273.5	2509	2044.25	2127.25	1019.67	1029.67	967.667	518.667	552	537.333	4838	4416.75	4349.25	2322.5	1925.75	1877.25	2037.67	1883	1823	1150.33	1057.33	1039.33	4855.25	4438.25	3930.75	2269	1900.75	1852.25	1940	1884.67	1653.33	1084.67	1087	962	28314.2	31913	30453.8	29486.8	30584.2	30799.5
600	4766.75	4109.5	4284	2488	2035.75	2113.75	1028.67	1041	973	517	558	528.333	4876.5	4455.75	4389.75	2322	1933.75	1875	2082.67	1931.33	1863	1145.67	1061.33	1042.33	4936	4518.5	3994	2285.75	1924.5	1867.25	1971	1917	1673.33	1096	1105.33	953	28443	31728.5	30524.5	29630.5	30512.2	30885.5
620	4857.5	4190.5	4378.75	2509.25	2046.75	2123.75	1056.33	1063.33	998	510.667	552	535.667	4939.5	4517.75	4451	2326.5	1934	1876.75	2121	1967.67	1899	1144.67	1059	1047.33	5011	4580.5	4046	2279.75	1917.25	1860.25	2015.33	1954.67	1716.33	1093	1101.33	966	28350.2	31903	30646.2	29541.8	30693.5	30997.2
640	4884.75	4223.75	4411.75	2499.75	2042.75	2121.5	1080.33	1087	1019.33	517.667	555.667	544.333	4981.25	4561	4490	2324	1931.5	1874.25	2142	1988.33	1925.67	1142.67	1057	1044.33	5045.25	4621.5	4090.75	2279.25	1914.5	1862	2064.67	2003	1757	1096	1101	969.667	28448.5	31799.2	30559.2	29546.5	30599.8	30882.5
660	4931.75	4260.25	4463.25	2508.5	2048.75	2133.25	1099.67	1102	1037.33	532.333	571.333	544.333	5047	4612.5	4547.5	2332.5	1939.5	1879.75	2197	2028.67	1965.67	1132.67	1047.33	1047.33	5082.5	4647.75	4113	2279.5	1913.75	1852.5	2081.67	2016.33	1775	1103	1107.67	964.667	28394	31857.5	30642.8	29567.5	30679.5	31044.8
680	4971.75	4297.75	4496.5	2503.5	2044.25	2122.25	1123	1126	1056.67	523.667	563	541.333	5092	4653.25	4581.25	2331.75	1938.25	1878.75	2230.67	2065	1995	1140.67	1058	1055	5188	4747.25	4198.25	2290.25	1925.5	1862.25	2119.67	2049	1804.67	1105.67	1111.33	963	28367	31801.8	30529.2	29526.2	30638.8	30948.8
700	5040.25	4359.5	4564.75	2504	2045.75	2122.5	1127.67	1133	1068.67	519	559.333	547.333	5159.75	4710	4643.5	2336.25	1947.25	1886.5	2266.67	2095.67	2027.67	1148.33	1064	1051.33	5246	4790.25	4241.5	2296.25	1930.25	1868.5	2155.33	2082.33	1841	1085	1093	968	28440.8	31843.5	30645	29614	30681	31048.2
720	5077.5	4395.25	4603.5	2493.75	2041.5	2116	1156.33	1160	1090.33	512.333	558.333	539.667	5176.5	4731.5	4661.5	2320.5	1935	1873	2303.67	2136.33	2066.33	1138	1061	1050	5273	4821.5	4265.25	2286	1927	1864.5	2186.33	2119.67	1865.33	1092.33	1105.67	964.667	28528	31798.2	30660.5	29708.5	30651.5	31023
740	5110	4429.75	4632.75	2495.5	2043.25	2124.5	1170.33	1170.33	1102.67	516.667	558.667	549.333	5223.25	4776	4713.75	2331.75	1943	1881.75	2344.33	2167.33	2098.33	1145.67	1063.67	1057.33	5339.5	4880.5	4320.5	2292	1928.75	1867	2217.33	2137.33	1889	1084	1092.67	963.333	28349	31762.8	30750.8	29532	30645.8	31224.2
760	5187.5	4487.5	4700	2509.75	2048.75	2123.25	1207.33	1202.67	1136	513	552.667	556	5299.75	4849.5	4784	2337.75	1947.75	1888.75	2377.67	2201.33	2131.67	1148.33	1061.67	1058	5378.5	4917.75	4367	2286.75	1922	1868.25	2271	2187.33	1938.33	1084.33	1091.67	971	28441.8	32067.2	30651	29600.8	30880.5	31000.8
780	5237.25	4539.75	4761.5	2518.75	2060	2133.5	1223	1218.33	1152.33	515	553.667	558.667	5336	4879.25	4810	2335.5	1939.5	1877.5	2417.67	2231.67	2161.33	1142.67	1055.67	1054	5422.75	4951.75	4388.25	2294	1926.75	1868.25	2300.67	2217	1965.67	1098	1102.67	975.667	28189.5	32043.5	30542	29389	30977	31055
800	5245	4548.5	4775.5	2513	2052.75	2131.5	1229.33	1222.67	1157.33	529.667	565	557	5361.75	4899.75	4835.5	2340	1948	1892	2438.33	2253.67	2190.33	1151	1065	1066.33	5481.25	5006.25	4437.5	2290.5	1924	1866.5	2340.33	2250.67	1992.33	1097.67	1102	971	28409.5	31990.2	30572.2	29525	30883.5	31051
820	5272.25	4574.25	4796	2494.75	2041.75	2118.25	1248.67	1246.33	1179.67	502.333	545.667	551.667	5393.25	4937.75	4878	2339.25	1950.5	1885.25	2474.33	2292.33	2222	1134	1050.67	1058.33	5517	5044.5	4470.75	2287.25	1926.25	1860	2357.33	2271.33	2015	1092	1101	967.667	28428	31816.2	30526	29603.5	30728	31113.8
840	5317	4611.25	4831.75	2507	2053.75	2132.5	1272.33	1268.33	1195.33	512.333	555.667	562.667	5458.25	4986.25	4911.25	2338.75	1952.5	1896	2512.33	2326.67	2257.67	1125.33	1045.33	1062	5554.5	5076.25	4506.25	2290.5	1927.5	1869.75	2388.67	2302.33	2045.33	1088	1099	978.667	28462.2	31830.2	30426	29601.5	30770.2	31023
860	5360.5	4650.5	4883.5	2510	2053.25	2128.25	1289.67	1279.67	1214	531.333	569.333	564	5494.75	5014.5	4948.75	2342.75	1950	1884.75	2539.33	2347.67	2277	1130.67	1046.33	1071	5585.25	5102	4522	2283.75	1920.25	1856.25	2427.67	2332.67	2070	1095.67	1102.33	985.667	28416.2	31944.2	30482.8	29607.8	30874.2	31069.8
880	5432.5	4716.75	4949	2528.25	2068	2140.75	1319.33	1306.67	1235.33	503	541.667	567.667	5534.5	5057.75	4979.75	2341.5	1949	1890	2581	2384.33	2311.33	1134.67	1048.67	1069.33	5658	5163	4570.25	2296	1929.25	1869.75	2476	2377.33	2112	1081.33	1087.33	988	28386.5	32042.8	30544.2	29573.5	30983.5	31055.2
900	5449.75	4725.5	4959.75	2518	2057.5	2131.5	1332.33	1321.33	1248	514.333	553	572	5580.25	5102.75	5028	2350.25	1958.25	1901	2621.67	2422.33	2349.33	1129	1042.67	1077	5693.5	5202.75	4611.25	2300.25	1936.5	1875.75	2497.33	2396.33	2136	1093.67	1100.67	987.333	28308	31999	30558.8	29496.8	30968.5	31128.5
920	5468.75	4752	4997.75	2517	2058.25	2131.5	1344	1329	1259.33	512	553	562.667	5591.5	5113.75	5040.75	2349	1956.25	1894.75	2642.33	2445	2375.67	1130.67	1046	1069.67	5709.25	5217.25	4621.75	2289.25	1927.75	1868.5	2521	2421.33	2161	1088	1096	986	28475.2	31960.2	30532	29672.8	30793.8	31165.2
940	5474.25	4749.5	4999	2503.75	2050.75	2124	1368	1351	1281.33	526.333	567.333	577.667	5625.75	5140.75	5077	2354	1963.5	1901	2671	2466.33	2391	1148	1067.33	1078	5746.5	5251.25	4655.75	2291.25	1930.25	1867.75	2545	2442	2180.33	1088	1097.33	990	28252	31884.2	30395.8	29434	30866.5	30979.2
960	5536	4806.75	5058.25	2519.5	2060	2141.25	1397.67	1377.67	1306.67	511.333	553.333	582.333	5672.75	5179.5	5116.75	2348.5	1958	1902	2715.67	2508.67	2435.33	1143	1060	1085	5839.75	5334.5	4726.75	2314.75	1948	1887.75	2608.33	2495.33	2231	1088.67	1097.67	1007	28390.2	31964.8	30379.2	29599.2	30933.2	31156.8

## Sheet: mean and SD complete
Proteasomal activity assay: mean values and standard deviations of triplacated experiments.
	w/o I-Hg, cy			w/o I-Hg, cy, lact.			w/o I-Hg, nu			w/o I-Hg, nu, lact.			I-Hg 4h, cy			I-Hg 4h, cy, lact.			I-Hg 4h, nu			I-Hg 4h, nu, lact.			I-Hg 24h, cy			I-Hg 24h, cy, lact.			I-Hg 24h, nu			I-Hg 24h, nu, lact.			positive (AMC)			positive (AMC), lact.
t [min]	mean	SD		mean	SD		mean	SD		mean	SD		mean	SD		mean	SD		mean	SD		mean	SD		mean	SD		mean	SD		mean	SD		mean	SD		mean	SD		mean	SD
20	305.5	140.729		309.333	139.222		88.1111	26.4183		87.6667	23.6925		185.667	19.6315		229.667	107.032		126	24.6329		117.667	22.5265		153	21.8675		166.667	89.9393		86.3333	27.2356		75.1111	24.3729		30407.6	1383.83		30258.7	535.881
40	646.917	192.622		710.833	180.617		195.889	48.1737		183.556	49.1362		647.833	49.8199		590.75	158.587		391	39.8427		405.889	43.2079		530	188.221		520.917	140.378		339.111	95.0049		359.778	100.733		30045.2	1355.27		30309.1	833.93
60	984.583	207.523		1149.33	194.638		287.778	47.1997		275.444	47.8381		1097.75	68.2994		986.75	178.939		580	42.4421		609.889	47.8915		992.083	230.184		944.583	162.93		534.778	99.063		549.444	70.9345		29802.2	1275.34		30081.9	737.109
80	1390.08	321.185		1484.17	207.751		353.556	43.5244		345.333	45.9674		1429.33	84.1391		1294.42	196.309		698.667	48.1283		735	53.8145		1314.33	259.709		1260.75	182.191		661.667	102.02		687.111	66.5118		29740.2	1286.76		30004.4	669.702
100	1604.83	331.696		1748.08	218.692		401.333	40.8833		395.556	39.6503		1701.67	99.6294		1549.83	210.446		797.222	53.6515		830.667	57.6204		1581.08	284.83		1506.58	196.692		757.778	105.395		794.222	69.5991		29690.1	1287.39		29933.7	657.025
120	1787.42	340.656		1977.58	230.334		442.444	38.8806		440.556	39.5114		1951.33	114.941		1789.33	227.393		872.556	57.0003		929.111	63.8943		1842.83	309.847		1752.75	210.843		828.667	106.192		864.778	65.5018		29749.4	1285.94		30034.4	699.905
140	2112.58	466.876		2196.25	247.297		480.222	34.9004		484	35.5074		2163.5	134.954		2001.67	247.127		946.111	67.1667		1007.22	73.886		1913.83	220.601		1947.08	229.416		894.778	113.945		941.667	64.9778		26647.7	6697.6		26971.8	5706.72
160	1680.5	430.595		1650.25	213.535		420.778	46.1126		357.333	37.5337		1863.33	101.433		1640.08	209.088		907	52.0651		762	43.3295		1471.25	163.034		1460.42	183.563		613.556	100.599		668.889	93.5796		26003.1	3625.14		23542	5189.39
180	2463.67	272.24		2223.33	245.9		522.222	32.8859		518.111	37.4764		2440.67	141.187		2054.83	244.706		1026.56	64.2273		1033	54.1367		2189.83	241.512		2025.58	229.014		962.889	108.935		1035	111.837		29877.8	1241.62		30077.3	687.662
200	2622.08	274.654		2213.33	243.649		552.222	32.0803		526	48.0867		2606	149.182		2040.83	243.347		1076.56	65.7684		1067.44	85.6773		2365.08	260.486		2017.75	228.347		1015.67	108.828		1033.44	112.012		29836.9	1312.87		30044.1	777.097
220	2747.92	281.359		2211.17	245.97		578.556	33.6028		520.444	40.8389		2783.75	163.866		2039.58	241.949		1131	71.7039		1067	81.1672		2533	276.465		2007.25	227.1		1070.11	115.354		1048	119.578		29834.8	1346.42		30009.8	881.858
240	2888.5	286.316		2202.42	245.318		620.111	31.4366		522.111	33.2237		2956.58	170.607		2053.5	241.469		1185.56	72.4372		1061.67	72.7217		2697.83	295.649		2003.25	226.35		1118.56	116.215		1042.67	112.908		29729.8	1225.71		29906.4	614.705
260	3033.67	292.068		2210.17	245.189		638	32.5389		533.111	40.2		3099.33	178.275		2048.08	246.322		1228.33	75.5697		1061.89	75.3808		2852.42	309.559		2005.42	227.512		1166.78	120.823		1040.11	107.213		29881.2	1426.73		30087.8	789.604
280	3150	296.119		2210.5	246.344		660.889	29.729		533.667	40.6243		3226.83	189.088		2039.08	243.41		1288.67	80.0465		1067.22	66.4934		3000	323.794		2012.08	229.778		1224	124.795		1043.89	105.881		29882.6	1399.8		30033.9	703.125
300	3275.75	297.452		2222.58	245.093		687.889	28.6479		527.667	30.8779		3365	194.983		2041.25	242.264		1335.89	78.0558		1076.22	71.9447		3170.83	339.94		2014	228.729		1268.11	122.52		1040.22	90.6951		30011.8	1398.4		30132.2	605.807
320	3376	306.431		2216	246.163		719.111	30.8407		520.556	29.1783		3484.92	202.298		2037.58	247.873		1377.67	83.3973		1063.33	70.4651		3285.75	350.887		2014.25	228.441		1322.33	127.091		1044.22	93.1941		30025.2	1536.91		30105.1	755.418
340	3475.92	306.361		2215.33	243.723		739.222	31.3924		529.222	29.6073		3599.58	205.188		2041	241.203		1422.33	82.479		1070.78	69.133		3395.17	363.398		2001.92	226.558		1352.78	126.017		1040.11	90.2751		30083.2	1435.26		30147.2	614.155
360	3575.75	310.588		2218.08	242.123		775	30.0222		528.333	23.9049		3704.83	217.913		2052.25	246.165		1479.67	87.3002		1072.33	63.3044		3514.75	377.8		2013.67	228.876		1400.11	129.68		1044.11	95.9608		30094.7	1582.41		30093.2	683.724
380	3686.75	308.419		2215.75	246.498		794.667	30.8995		544.222	30.6962		3799.17	213.286		2048.08	244.829		1523.44	85.0832		1076	66.0614		3625.5	383.382		2010.5	231.28		1445.33	133.012		1044.78	85.0035		30230.2	1476.34		30251.6	604.892
400	3727.25	314.704		2197.25	246.535		805.222	32.0023		530.333	26.5016		3881	222.465		2045.58	244.615		1561.89	91.4879		1072.89	64.1607		3708.33	394.734		2005.67	229.505		1470.67	135.77		1038.78	92.5265		30059.9	1543.37		30117.2	667.474
420	3815.58	316.693		2223.92	247.6		835.222	32.6366		534.556	25.0118		3976.58	230.018		2052.75	245.418		1615.44	95.3475		1084.89	63.9968		3827.92	408.552		2025.25	232.737		1526	140.625		1043.89	86.5527		30132.7	1656.32		30162.5	670.32
440	3901.75	324.214		2221.58	245.9		863.444	31.5812		536.222	23.6299		4064.25	230.362		2046.92	247.201		1657.78	96.1979		1080.56	58.0204		3922.58	419.369		2021.67	231.075		1569.67	138.531		1049.89	88.5672		30217.5	1630.12		30227.4	549.364
460	3978.5	325.136		2228.5	246.344		879	29.4637		539.889	23.6299		4129.25	237.987		2042.42	241.864		1691.22	96.7645		1075.44	53.3774		4013	423.633		2021.83	227.724		1599.22	140.06		1038	83.4752		30136.3	1652.8		30177.3	607.783
480	4026.17	324.495		2204.33	245.557		891.667	32.5184		534.333	24.0901		4182.67	238.714		2037.5	244.475		1724.11	100.236		1077.56	59.0615		4065.83	432.704		2020.58	228.06		1625.33	143.472		1049.11	93.9635		30129.6	1605.65		30163.6	607.075
500	4105.33	325.444		2218.5	243.625		926.222	32.6349		542.778	21.9503		4285.42	247.088		2045.75	243.958		1760.78	100.709		1081.67	59.8173		4126.17	432.437		2007.67	228.277		1672.22	142.825		1051.22	90.2985		30190.7	1657.83		30249.4	557.946
520	4171.83	330.8		2215.33	246.375		944.667	32.3161		540.889	19.271		4350.25	244.095		2046.75	242.761		1798.22	102.32		1078.44	57.8286		4187.58	438.22		2002.17	227.586		1717.44	148.098		1052	85.7445		30293.7	1702.48		30400.4	657.199
540	4246.92	337.184		2228.08	244.707		959.444	31.4472		532.556	19.3487		4410	251.894		2042.42	243.554		1842.33	104.978		1083.89	60.6047		4304.08	452.006		2022.08	231.312		1759	151.777		1051.56	80.7619		30302.2	1765.65		30401.9	788.053
560	4300.33	329.631		2227.5	245.097		986.111	33.2872		539.444	21.1064		4474.25	255.254		2047.67	246.696		1880.78	105.48		1078.89	52.5952		4367.25	461.165		2019.42	230.219		1782.78	151.312		1044.56	73.734		30375.8	1706.21		30471.3	689.296
580	4372.92	340.442		2226.83	247.862		1005.67	33.2866		536	16.7066		4534.67	264.854		2041.83	244.271		1914.56	110.758		1082.33	59.5735		4408.08	462.988		2007.33	227.904		1826	152.072		1044.56	71.5047		30227	1810.06		30290.2	704.054
600	4386.75	340.459		2212.5	241.756		1014.22	36.2282		534.444	21.1721		4574	264.043		2043.58	242.899		1959	112.416		1083.11	55.0013		4482.83	472.012		2025.83	226.907		1853.78	158.585		1051.44	85.383		30232	1662.17		30342.8	644.441
620	4475.58	343.882		2226.58	247.806		1039.22	35.8707		532.778	20.8175		4636.08	264.878		2045.75	244.816		1995.89	113.659		1083.67	53.1486		4545.83	483.433		2019.08	227.536		1895.44	158.053		1053.44	75.8437		30299.8	1801.53		30410.8	767.819
640	4506.75	340.586		2221.33	244.31		1062.22	37.2921		539.222	19.5088		4677.42	265.511		2043.25	244.816		2018.67	111.311		1081.33	53.4925		4585.83	478.249		2018.58	227.265		1941.56	162.777		1055.56	74.424		30269	1694.13		30342.9	704.057
660	4551.75	344.387		2230.17	244.719		1079.67	36.6803		549.333	19.975		4735.67	271.574		2050.58	245.968		2063.78	119.597		1075.78	49.2672		4614.42	485.609		2015.25	230.887		1957.67	161.532		1058.44	81.2475		30298.1	1757.29		30430.6	769.439
680	4588.67	346.324		2223.33	245.746		1101.89	39.1923		542.667	19.7005		4775.5	276.451		2049.58	246.168		2096.89	121.026		1084.56	48.6168		4711.17	495.861		2026	231.022		1991.11	165.286		1060	84.0522		30232.7	1736.48		30371.2	748.027
700	4654.83	349.201		2224.08	245.434		1109.78	35.703		541.889	20.7105		4837.75	280.835		2056.67	244.024		2130	123.144		1087.89	52.7282		4759.25	502.967		2031.67	231.207		2026.22	164.507		1048.67	69.9738		30309.8	1725.97		30447.8	745.032
720	4692.08	349.645		2217.08	242.479		1135.56	39.2065		536.778	23.1357		4856.5	279.33		2042.83	242.456		2168.78	121.948		1083	47.9479		4786.58	504.782		2025.83	227.468		2057.11	169.396		1054.22	77.8434		30328.9	1660.15		30461	677.639
740	4724.17	349.217		2221.08	241.099		1147.78	39.0674		541.556	22.0538		4904.33	277.938		2052.17	244.055		2203.33	126.89		1088.89	49.2729		4846.83	510.334		2029.25	229.633		2081.22	171.208		1046.67	72.2988		30287.5	1753.39		30467.3	860.117
760	4791.67	358.89		2227.25	247.472		1182	39.9054		540.556	23.9219		4977.75	280.777		2058.08	243.988		2236.89	126.796		1089.33	51.1284		4887.75	506.417		2025.67	227.696		2132.22	173.045		1049	67.6494		30386.7	1827.15		30494	775.91
780	4846.17	356.375		2237.42	246.398		1197.89	39.5212		542.444	23.8987		5008.42	285.801		2050.83	248.47		2270.22	132.445		1084.11	50.7174		4920.92	517.939		2029.67	230.781		2161.11	174.353		1058.78	72.0141		30258.3	1942.6		30473.7	940.158
800	4856.33	355.216		2232.42	246.162		1203.11	39.7846		550.556	18.5273		5032.33	287.086		2060	244.098		2294.11	128.852		1094.11	49.2717		4975	522.576		2027	230.002		2194.44	180.684		1056.89	74.4135		30324	1803.24		30486.5	836.885
820	4880.83	356.649		2218.25	242.492		1224.89	39.181		533.222	26.9183		5069.67	281.819		2058.33	245.459		2329.56	130.22		1081	46.0591		5010.75	523.941		2024.5	229.947		2214.56	178.089		1053.56	74.518		30256.8	1710.1		30481.8	784.661
840	4920	361.057		2231.08	242.173		1245.33	43.3474		543.556	27.2648		5118.58	296.541		2062.42	240.973		2365.56	131.712		1077.56	42.2076		5045.67	524.794		2029.25	228.084		2245.44	178.596		1055.22	66.5268		30239.5	1691.73		30464.9	758.345
860	4964.83	361.92		2230.5	244.942		1261.11	41.1047		554.889	20.5733		5152.67	298.071		2059.17	247.748		2388	135.738		1082.67	43.3602		5069.75	532.358		2020.08	230.573		2276.78	185.267		1061.22	65.5179		30281.1	1772.62		30517.2	793.692
880	5032.75	365.151		2245.67	247.413		1287.11	45.2859		537.444	32.5394		5190.67	300.312		2060.17	245.421		2425.56	139.479		1084.22	44.8916		5130.42	544.607		2031.67	230.844		2321.78	188.252		1052.22	55.6989		30324.5	1838		30537.4	835.547
900	5045	369.574		2235.67	247.291		1300.56	45.8456		546.444	29.3869		5237	299.604		2069.83	244.529		2464.44	140.966		1082.89	43.4669		5169.17	541.906		2037.5	229.567		2343.22	186.43		1060.56	63.5088		30288.6	1860.27		30531.2	899.468
920	5072.83	364.226		2235.58	246.451		1310.78	45.1791		542.556	26.8997		5248.67	299.138		2066.67	246.434		2487.67	138.359		1082.11	43.6836		5182.75	544.57		2028.5	227.751		2367.78	185.879		1056.67	61.3297		30322.5	1751.92		30543.9	776.982
940	5074.25	368.188		2226.17	243.168		1333.44	45.923		557.111	27.1505		5281.17	300.115		2072.83	245.495		2509.44	144.893		1097.78	43.8195		5217.83	546.142		2029.75	228.612		2389.11	187.998		1058.44	59.458		30177.3	1825.95		30426.6	861.449
960	5133.67	370.428		2240.25	245.226		1360.67	47.8226		549	35.6978		5323	304.513		2069.5	243.238		2553.22	145.381		1096	42.5793		5300.33	557.286		2050.17	231.108		2444.89	193.658		1064.44	49.9515		30244.8	1791.04		30563.1	842.151
