# Supplementary material for: Amyloid domains in the cell nucleus controlled by nucleoskeletal protein lamin B1 reveal a new pathway of mercury neurotoxicity
Source: PeerJ journal article supplement (doi:10.7717/peerj.754), 2015-02-05
Supplement: raw_data_WBs.pdf [file raw_data_WBs.pdf]

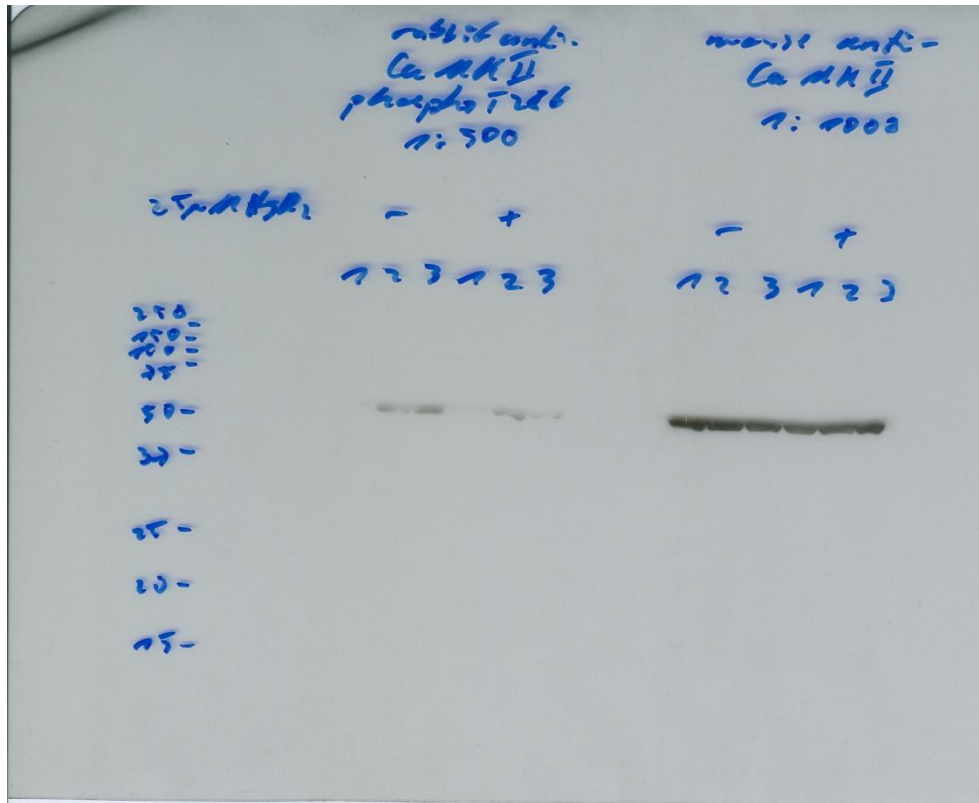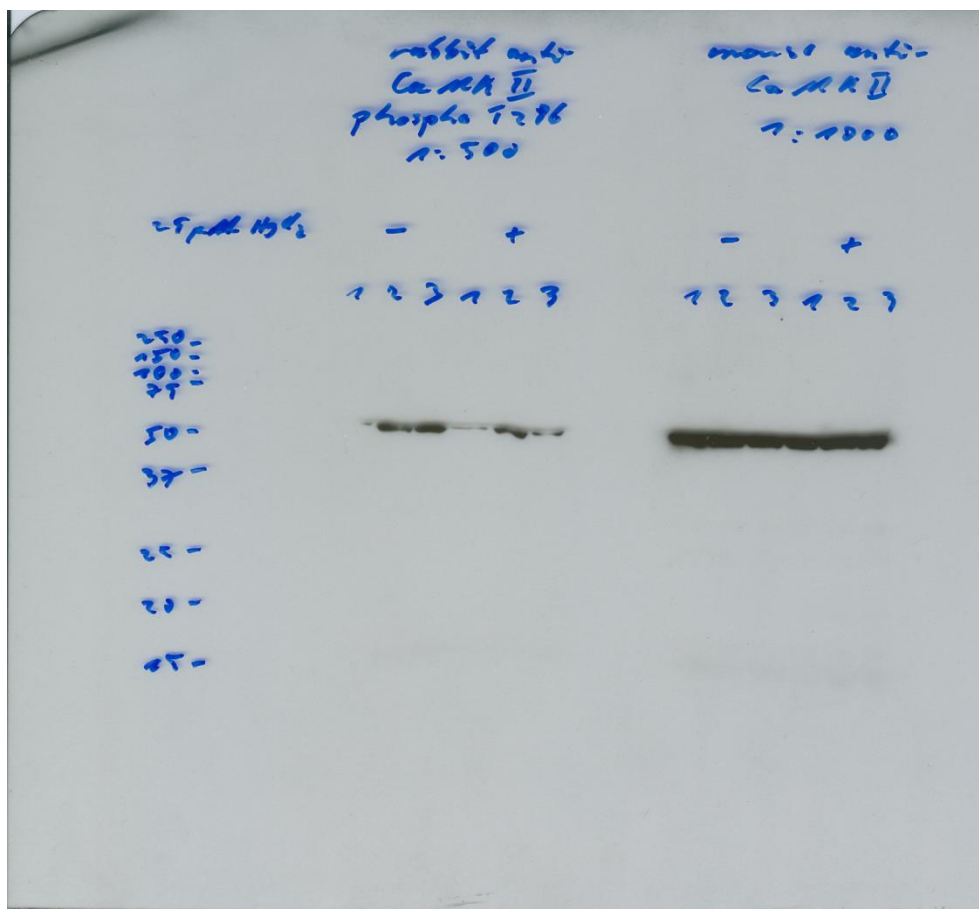

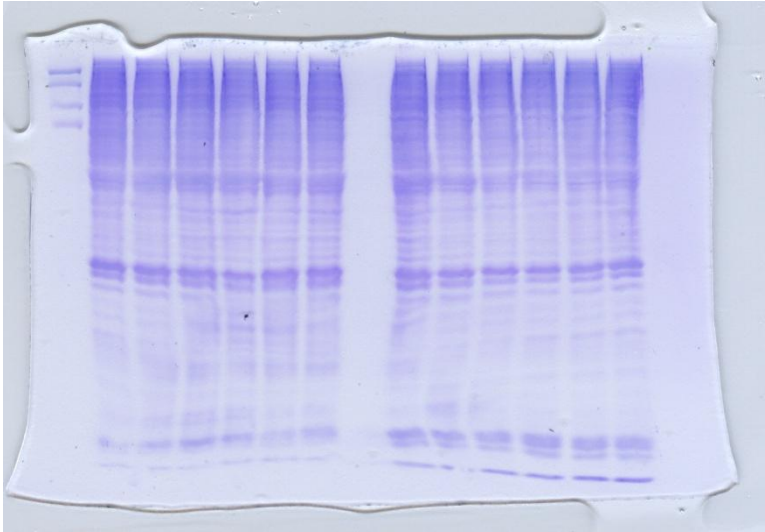

Raw data 1. Original Western blot Figure 1. Detection of CaMKII phospho T286 and total CaMKII in unstimulated and stimulated SH-SY5Y cells (untreated or pretreated with I-Hg).

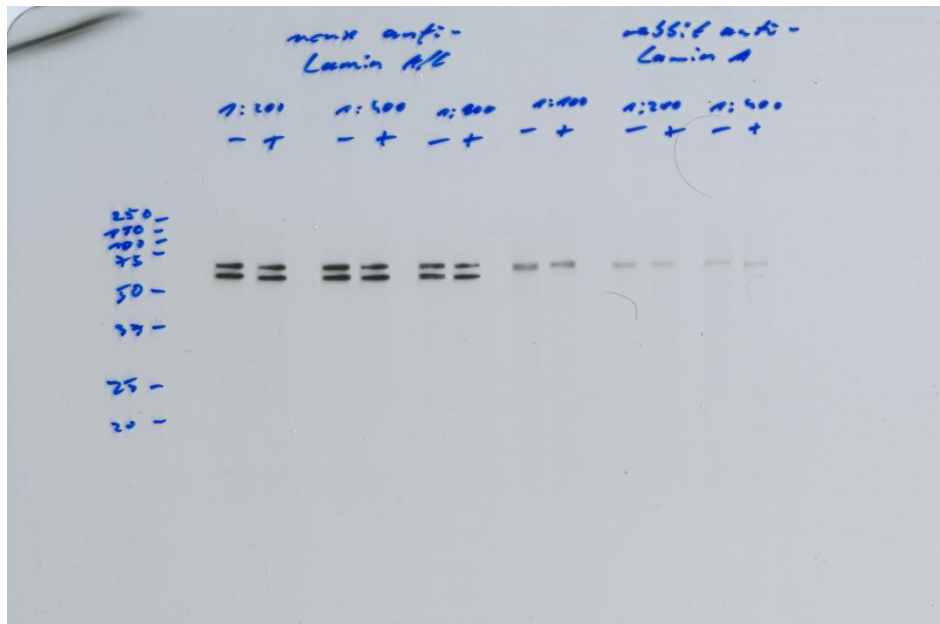

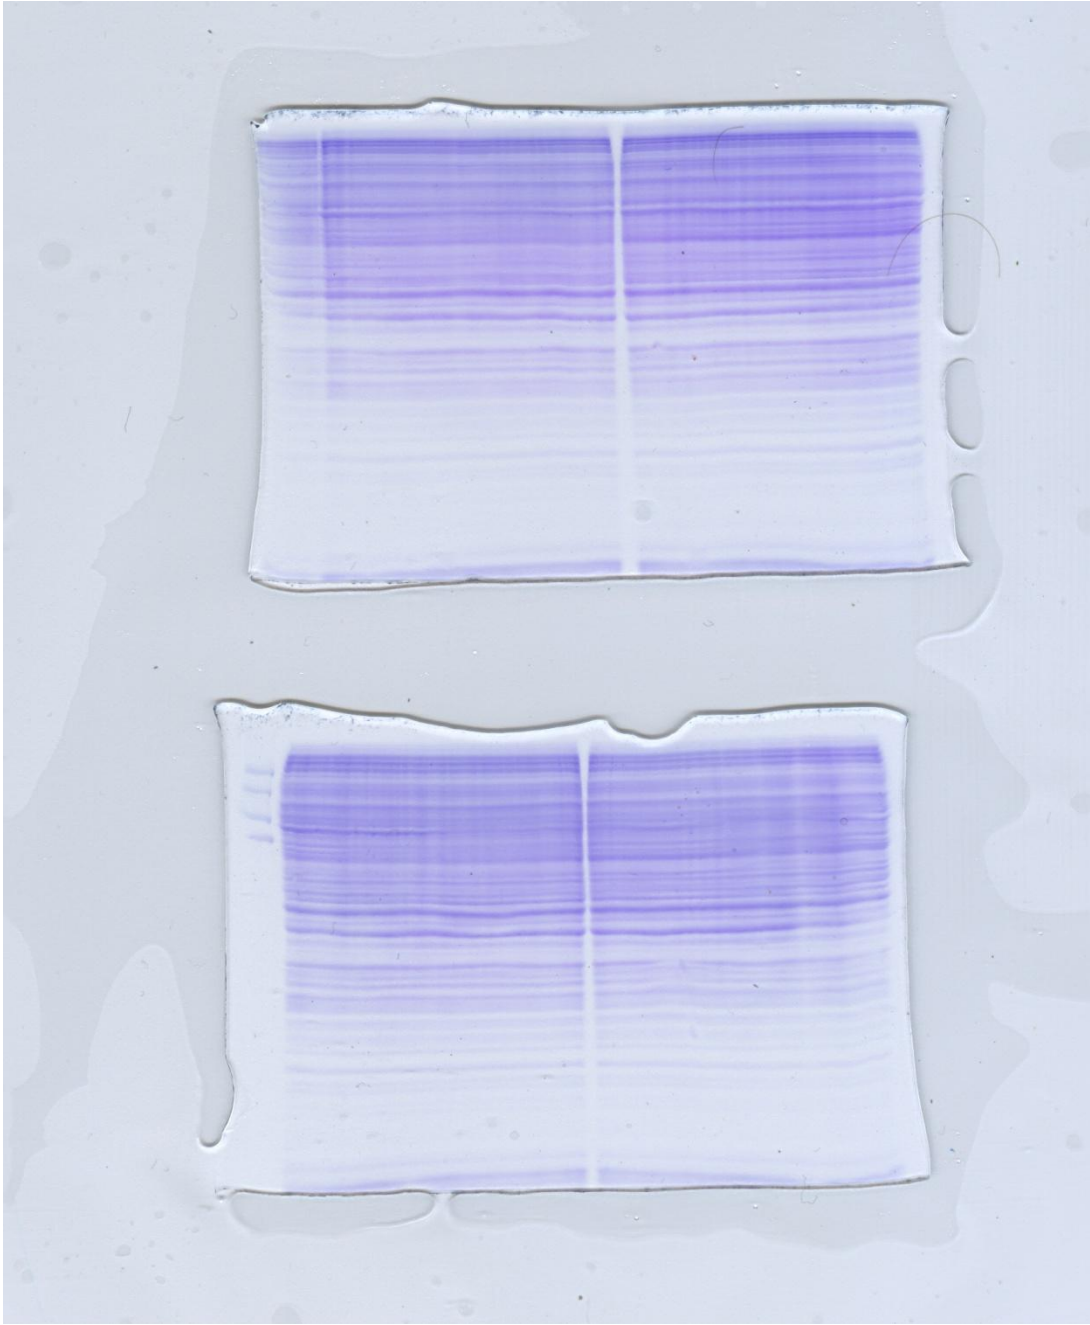

Raw data 2. Original Western blot Figure 4. Detection of Lamin A/C in untreated or I-Hg-treated HEp-2 cells.

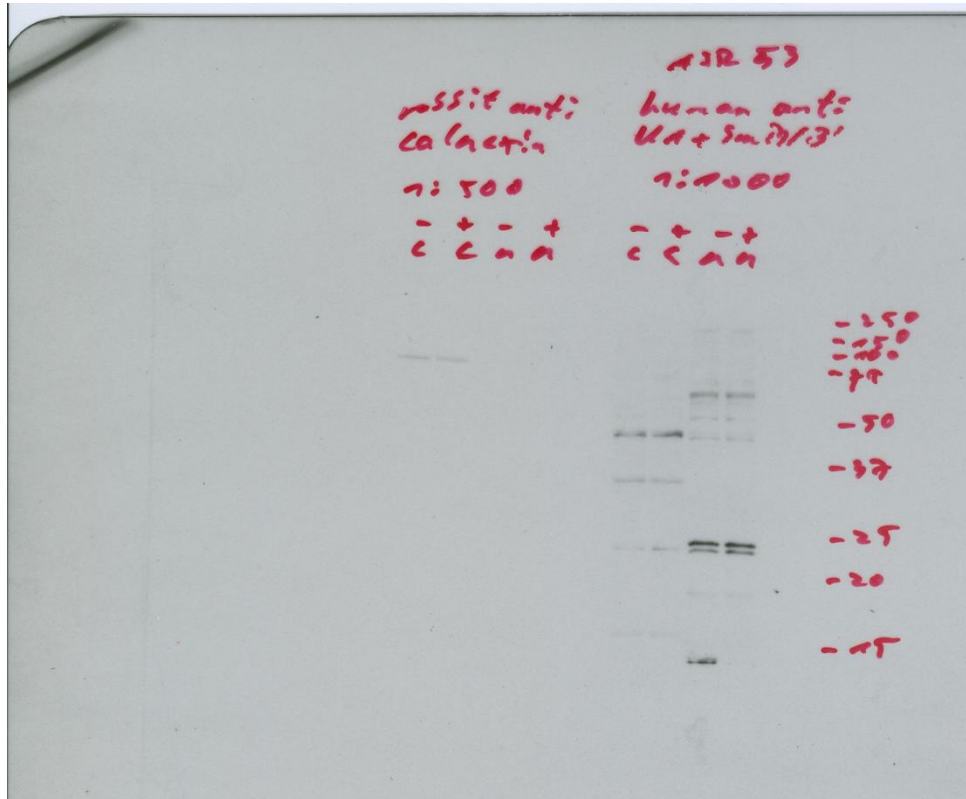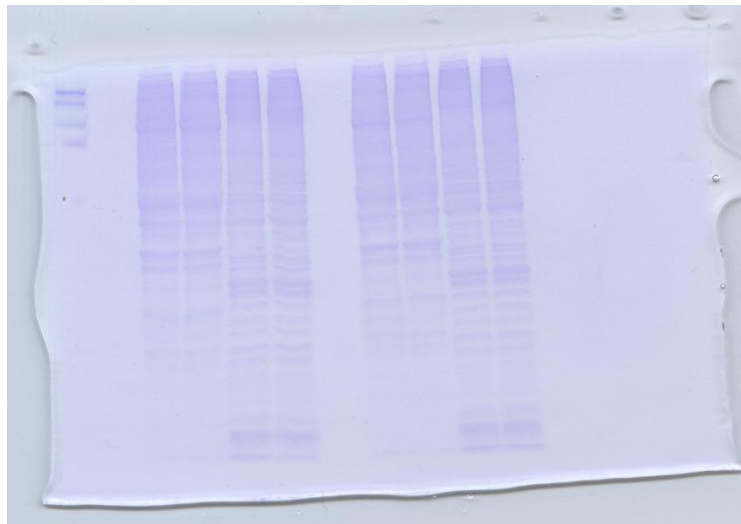

Raw data 3. Original Western blot Supplemental Figure S2. HEP-2 fractionation control.

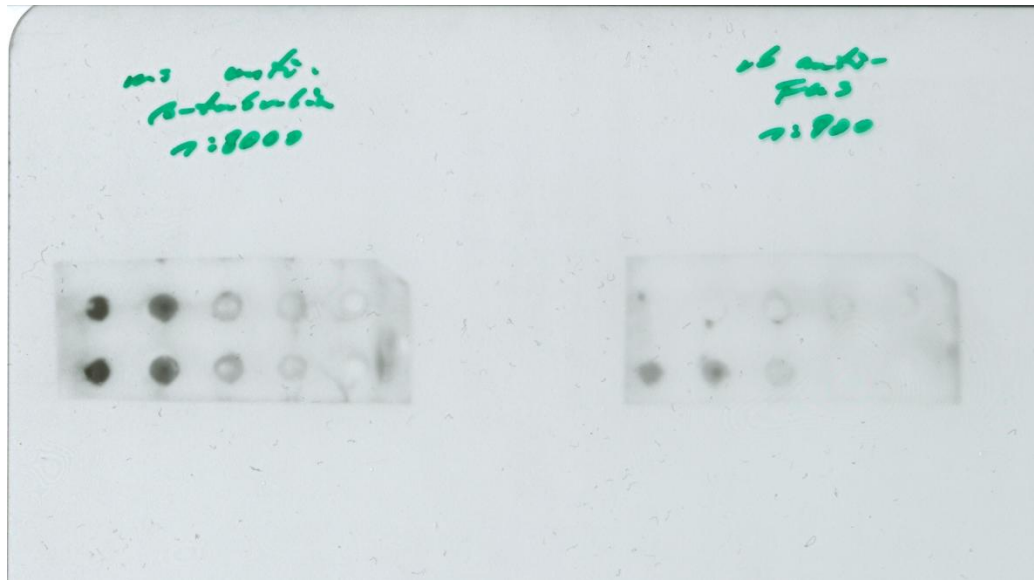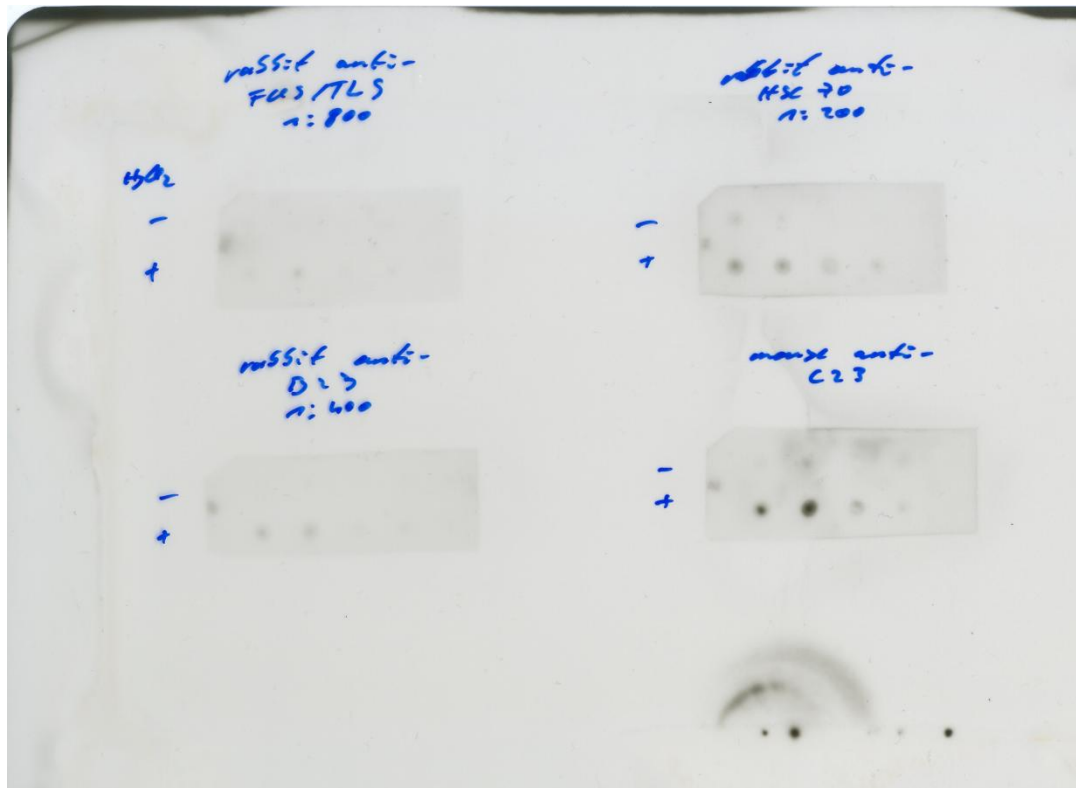

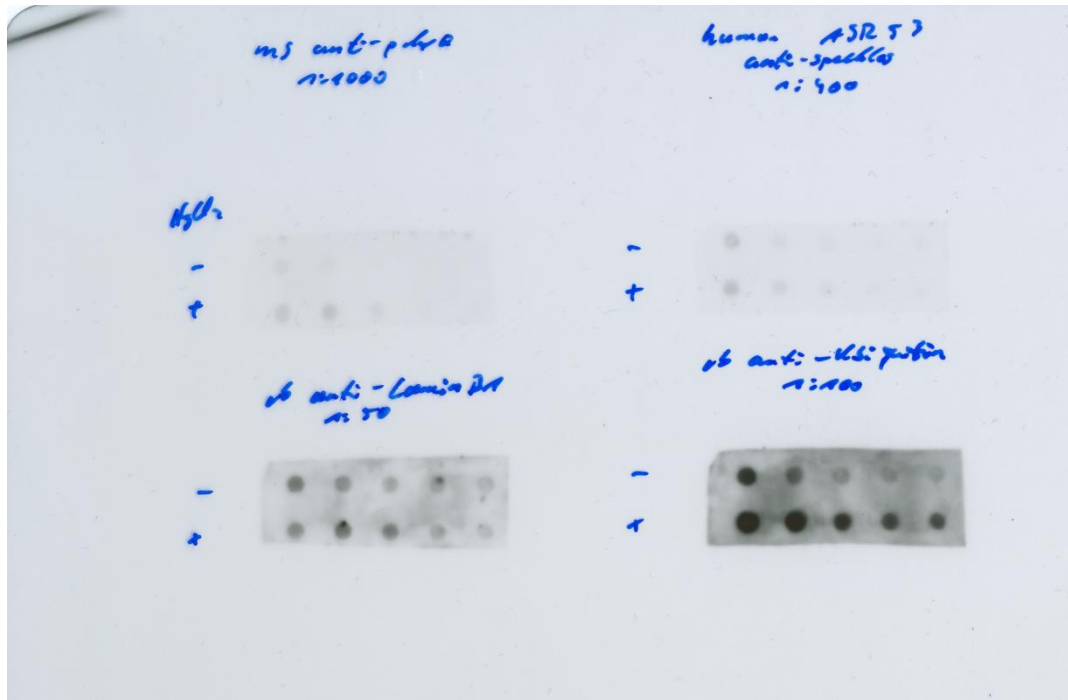

Raw data 4. Original filter retardation assay Supplemental Figure S4. Untreated or I-Hg-treated SH-SY5Y.

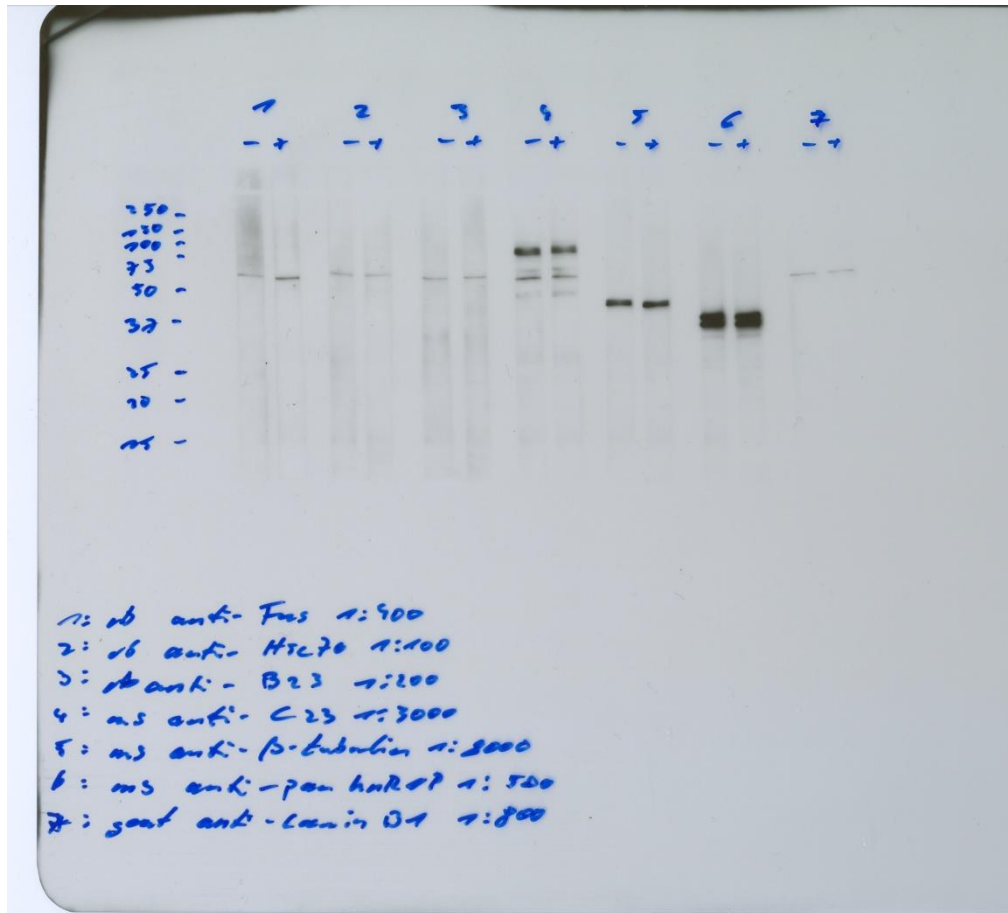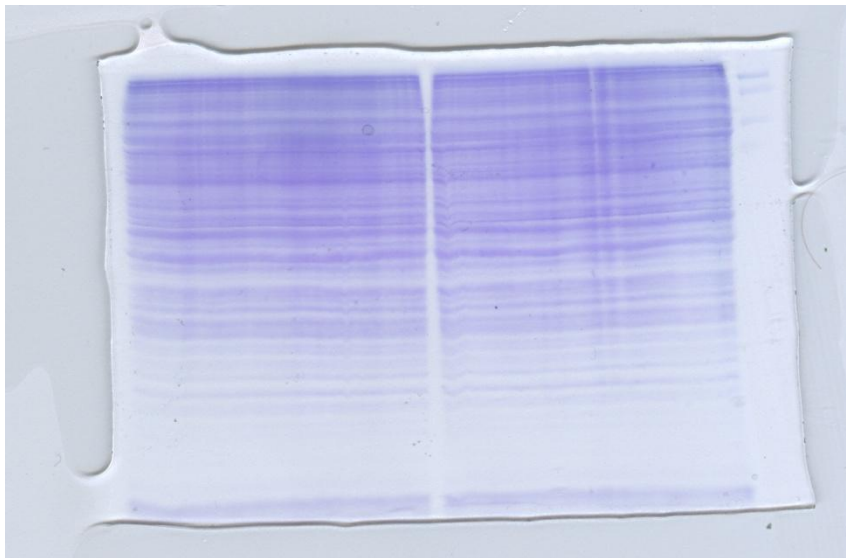

Raw data 5. Original Western blot Supplemental Figure S4. Untreated or I-Hg-treated SH-SY5Y.

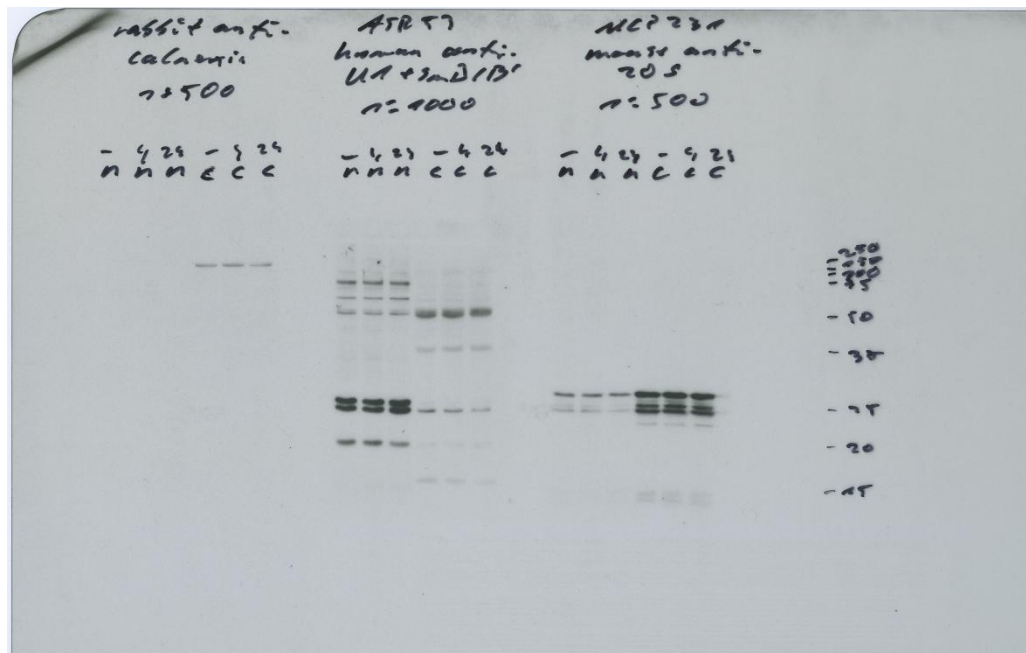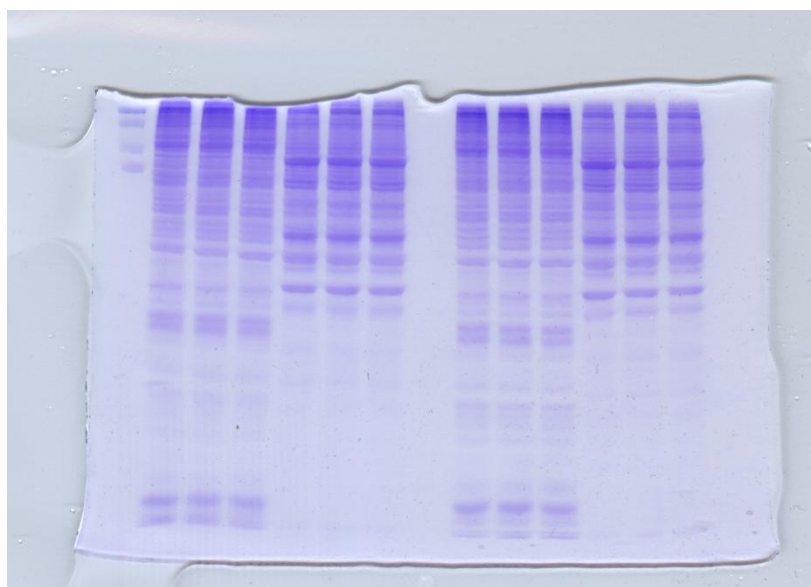



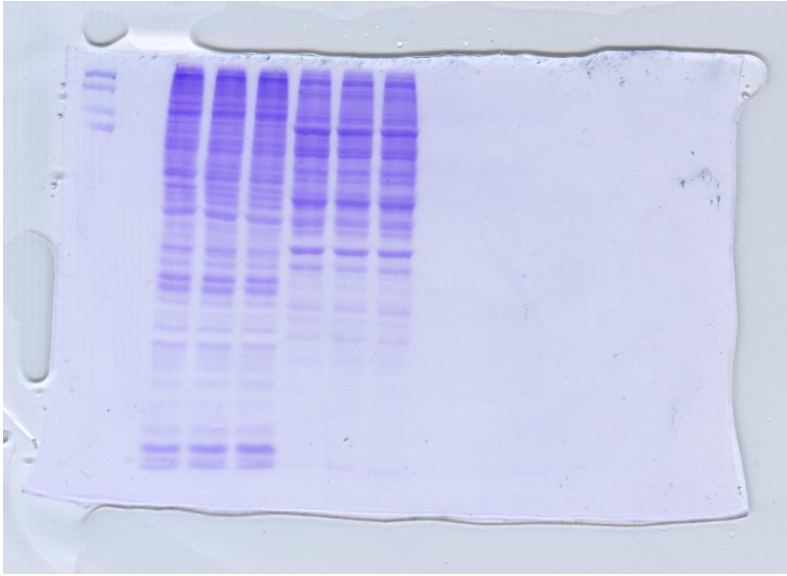

Raw data 6. Original Western blot Supplemental Figure S6. Untreated or I-Hg-treated (4h, 24h) HEp-2.

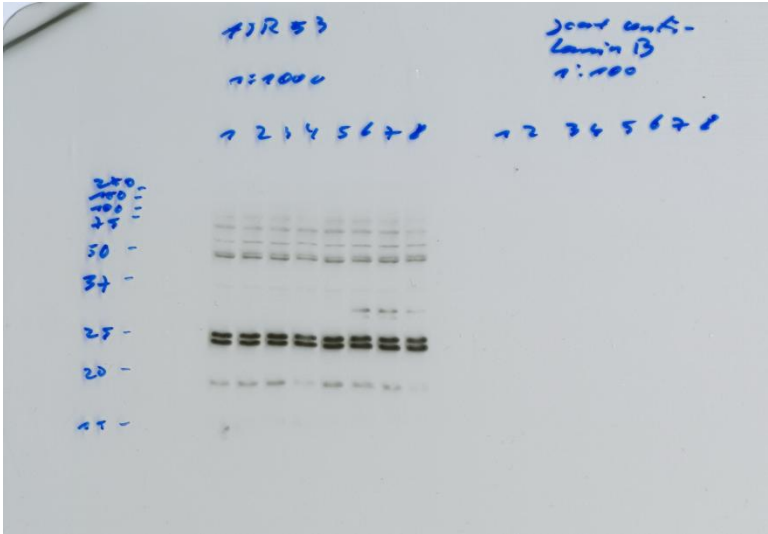

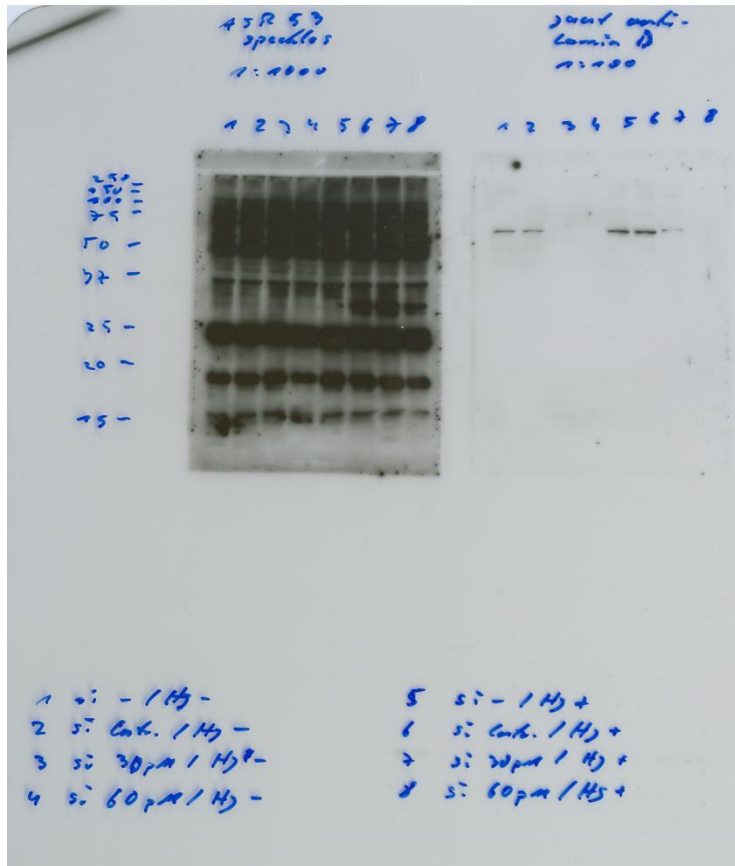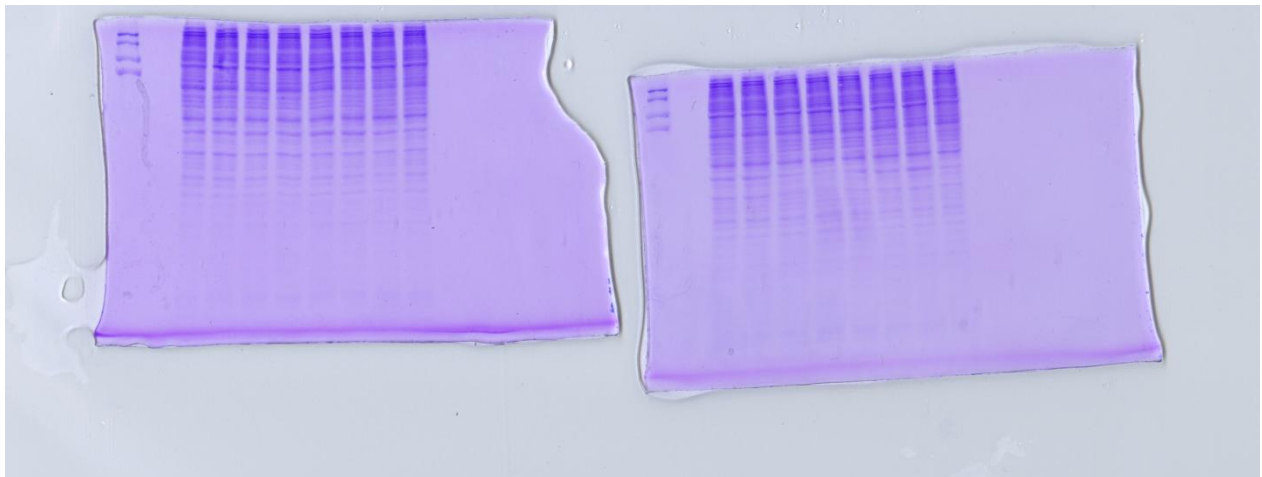

Raw data 7. Original Western blot Supplemental Figure S8. Untreated or siRNA-pretreated HEp-2 (untreated or I-Hg-treated).
